# Supplementary material for: High-resolution large-eddy simulation to understand ozone formation and atmospheric oxidation capacity in Houston, Texas
Source: Copernicus journal article supplement (doi:10.5194/egusphere-2024-1190), 2024-07-18
Supplement: Supplementary file [file egusphere-2024-1190-RC1-supplement.pdf]

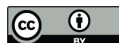

# High-resolution large-eddy simulation to understand ozone formation and atmospheric oxidation capacity in Houston, Texas

Akinleye Folorunsho<sup>1</sup>, Jimy Dudhia<sup>2</sup>, John Sullivan<sup>3</sup>, Paul Walter<sup>4</sup>, James Flynn<sup>5</sup>, Travis Griggs<sup>5</sup>, Rebecca Sheesley<sup>1</sup>, Sascha Usenko<sup>1</sup>, Guillaume Gronoff<sup>6</sup>, Mark Estes<sup>7</sup>, and Yang Li<sup>1</sup>

5 <sup>1</sup>Department of Environmental Science, Baylor University, Waco, 76798, Texas, USA

<sup>2</sup>National Center for Atmospheric Research, Boulder, 80307, Colorado, USA

<sup>3</sup>NASA Goddard Space Flight Center, Greenbelt, Maryland, USA

<sup>4</sup>Department of Mathematics, St. Edward's University, Austin, Texas, USA

<sup>5</sup>Department of Earth and Atmospheric Sciences, University of Houston, Houston, Texas, USA

10 <sup>6</sup>NASA Langley Research Center, Hampton, Virginia, USA

<sup>7</sup>Institute of Interdisciplinary Science, St. Edward's University, Austin, Texas, USA

*Correspondence to:* Yang Li (yang\_li3@baylor.edu)

## Abstract

Highly reactive volatile organic compounds (HRVOCs) from mobile and petrochemical sources are important players in atmospheric photochemistry that contribute to the formation of ozone (O<sub>3</sub>). In a typical elevated O<sub>3</sub> episode, we applied a high-resolution large eddy simulation (LES), coupled with the Weather Research and Forecasting model with chemistry (WRF-LES-Chem) to understand the mechanism of high O<sub>3</sub> production over the Houston area. Our modeling was constrained and evaluated using field measurements from the NASA Tracking Aerosol Convection Interactions Experiment – Air Quality (TRACER-AQ) project, Texas Commission on Environmental Quality (TCEQ), and vertical column density observations from Pandora spectrometers. The modeling results show enhanced performance in the LES domain, compared to the mesoscale models in simulating key chemicals. O<sub>3</sub> sensitivity in the Houston urban area demonstrates a nearly homogenous early morning VOC-limited regime and transits to a noontime NO<sub>x</sub>-limited regime. As the day progresses into the afternoon, the atmospheric oxidative capacity (AOC) increases with major contribution from hydroxyl (OH) radical (90 %). High concentrations of alkenes also increased O<sub>3</sub> (8-10 %) contribution to AOC in the late afternoon. The OH reactivity (K<sub>OH</sub>) is dominated by isoprene (35.76 %), carbon monoxide (CO; 12.98 %), formaldehyde (HCHO; 12.21 %), and alkanes with C > 3 (6.29 %), thus accelerating the production of hydroperoxyl (HO<sub>2</sub>) and peroxy (RO<sub>2</sub>) radicals. The concentrations of short-lived VOCs such as HCHO and acetaldehyde from the oxidation of HRVOCs, increased in the afternoon, which elevated O<sub>3</sub> production rates under a NO<sub>x</sub>-limited regime. The oxidation of isoprene also accelerated the production of HCHO and contributed to the production of HO<sub>2</sub> radicals, thus leading to a high O<sub>3</sub> production rate. This study suggests the possible impacts of NO<sub>x</sub>-O<sub>3</sub>-VOC sensitivity on O<sub>3</sub> production rates in polluted urban areas with high emission of HRVOCs, and also provides insights on radical chemistry that drives the photochemical processes of O<sub>3</sub> formation. Ultimately, the study underlines the need to control



anthropogenic emissions such as alkenes and HCHO and also highlights the role of naturally emitted isoprene species in elevated urban O<sub>3</sub> levels.

## 1. Introduction

35 The Houston metropolitan area is home to approximately 7.3 million people and represents a heavily-polluted urban atmosphere due to the presence of complex industrial emissions. Like many polluted urban cities in the United States, Houston is identified as an ozone (O<sub>3</sub>) nonattainment area by the U.S. Environmental Protection Agency (US EPA) due to its summertime exceedances of the National Ambient Air Quality Standards (NAAQS) (Shahriar et al., 2015; Botlaguduru et al., 2018), which cause severe human health concerns (Blanchard et al., 2008; Rammah et al., 2020). In 2015, the EPA lowered  
40 the 8 h O<sub>3</sub> NAAQS to 70 ppb with projected national attainment by 2025; however, this does not appear realistic over Houston, as evident from the observed O<sub>3</sub> concentrations from the TRacking Aerosol Convection ExpeRiment – Air Quality (TRACER-AQ) 2021 summertime campaign. Generally, O<sub>3</sub> exceedances are highly dependent on the source of primary emissions, chemical reaction rates of primary and secondary oxidants, and meteorological processes (Spiridonov et al., 2019). However, the sensitivity of O<sub>3</sub> to precursors' regimes may also undermine or enhance its production in the atmosphere (Zhou et al., 2014;  
45 Ye et al., 2016). Additionally, boundary layer dynamics that affect nonlinear chemistry-turbulence interactions are not well-resolved in mesoscale models with coarse resolutions, yet these processes are essential to understand chemical behaviors in polluted environments (Wang et al., 2023). Thus, this study is aimed to understand the complex pathways of O<sub>3</sub> production and changes in O<sub>3</sub> formation regime in the Houston urban atmosphere using a high-resolution modeling approach.

The O<sub>3</sub> problem in Houston, unlike other large metropolitan cities in the U.S., is a combined product of (i) highly reactive  
50 volatile organic compounds (HRVOCs) and nitrogen oxides (NO<sub>x</sub> = NO<sub>2</sub> + NO) emissions from automobile and industrial sources along the Houston Ship Channel (Souri et al., 2016b; Botlaguduru and Kommalapati, 2020), (ii) variability in the along-shore sea breeze and the planetary boundary layer (PBL) depth (Banta et al., 2011), (iii) the midday reversals of flow patterns or clustering of weak easterly and northeasterly winds (Darby, 2005; Souri et al., 2016a), (iv) potential transport of pollutants from regional and long-range sources (Morris et al., 2006; Berlin et al., 2013), and (v) complex photochemistry  
55 under the hot and humid Houston environment (Perring et al., 2013). Because of the heterogeneous automobile emission sources and the presence of multiple oil and natural gas industries in Houston, anthropogenic emissions play an important role in O<sub>3</sub> formation. Primarily, the photochemical processes of ethylene, propylene and 1,3-butadiene from the alkene group are identified as the major anthropogenic VOC contributors to enhanced O<sub>3</sub> formation over Houston (Nam et al., 2006; Kim et al., 2011; Czader and Rappenglück, 2015; Sadeghi et al., 2022). Additionally, the photochemical reactivities of isoprene and  
60 monoterpenes from biogenic sources are also major contributors to O<sub>3</sub> formation (Leong et al., 2017; Ma et al., 2022).

The self-cleaning response of the atmosphere to emissions, defined as atmospheric oxidative capacity (AOC), determines the rate of removal of primary pollutants (e.g., CO, NO<sub>x</sub>, and VOCs) by oxidizing chemical reactions with O<sub>3</sub>, OH, and nitrate radicals (NO<sub>3</sub>) (Geyer et al., 2003; Chen et al., 2020). AOC is an important driving force in understanding atmospheric



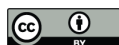

chemistry, as it determines the removal rate of primary pollutants and the production rate of secondary pollutants (Mao et al.,  
65 2010). The total sum of the oxidation rates of these pollutant species is thus used to estimate AOC (Li et al., 2021). Several  
studies have been carried out to quantify atmospheric oxidation processes and have shown that AOC is dominated by pollutant  
oxidation from OH radicals, especially in heavily polluted environments (Xue et al., 2016; Li et al., 2018; Zhu et al., 2020). In  
such environments, the average daytime AOC may range from  $6.7 \times 10^7$  molecules  $\text{cm}^{-3} \text{s}^{-1}$  to  $3.2 \times 10^8$  molecules  $\text{cm}^{-3} \text{s}^{-1}$  (Liu  
et al., 2022). In contrast,  $\text{NO}_3$  is insignificant during daytime photochemistry but principally contributes to nighttime AOC  
70 (Brown et al., 2011; Chen et al., 2019). However, experimental results from the TexasAQ-2000 campaign suggested that  $\text{NO}_3$   
contributes significantly to the daytime oxidation of monoterpenes and phenol in Houston (Geyer et al., 2003). Still, there is a  
very limited understanding of the daytime AOC over the Houston region, as compared to some other major urban polluted  
regions (Tan et al., 2019; Liu et al., 2022).

$\text{O}_3$  formation is driven by directly emitted precursors,  $\text{NO}_x$  and VOCs, yet the  $\text{O}_3$ - $\text{NO}_x$ -VOCs photochemistry is nonlinear,  
75 and two regimes with different  $\text{O}_3$ - $\text{NO}_x$ -VOC sensitivity have been identified (Sillman et al., 2003). Understanding the  
photochemical responses of  $\text{O}_3$  to reductions in emissions of  $\text{NO}_x$  and VOCs is crucial to developing an effective  $\text{O}_3$  control  
strategy. In a VOC-limited regime, for example, an incremental increase in VOCs promotes the chemical production of peroxy  
( $\text{RO}_2$ ) and hydroperoxy ( $\text{HO}_2$ ) radicals, which increases  $\text{NO}_x$  cycling and ultimately increases ambient  $\text{O}_3$  (Ye et al., 2016).  
By contrast, in a  $\text{NO}_x$ -limited regime, increased emissions of  $\text{NO}_x$  enhance the photolysis of  $\text{NO}_2$ , thus producing free reactive  
80 oxygen atoms, and ultimately reacting with  $\text{O}_2$  to produce  $\text{O}_3$ , resulting in increased  $\text{O}_3$  concentrations (Jin and Holloway,  
2015). Here,  $\text{O}_3$  is produced when the  $\text{HO}_2$  and  $\text{RO}_2$  radicals convert  $\text{NO}$  to  $\text{NO}_2$  without the consumption of  $\text{O}_3$ . Previous air  
quality campaigns over Houston have focused extensively on understanding  $\text{O}_3$  photochemistry to  $\text{NO}_x$ - and VOC-limited  
regimes. For instance, the TexAQS-2006 campaign (conducted from September to October 2006) showed that the rapid  
production of  $\text{O}_3$  was associated with a VOC-limited regime and a slow production was characterized by a  $\text{NO}_x$ -limited regime  
85 (Zhou et al., 2014). Evidence from the SHARP (April – May 2009) and DISCOVER-AQ (September – October 2013)  
campaigns also show that  $\text{O}_3$  production was more VOC-limited in the morning hours and  $\text{NO}_x$ -limited in the afternoon hours  
(Ren et al., 2013; Mazzuca et al., 2016). Despite evidence from the TexAQS-2006 campaign that reducing  $\text{NO}_x$  emissions  
from power plants led to reduced  $\text{O}_3$  concentrations (Cowling et al., 2007; Parrish et al., 2009), high  $\text{O}_3$  concentrations up to  
120 ppb were observed during the TRACER-AQ campaign. Nevertheless, this sensitivity regime is poorly understood over  
90 the Houston region and may be exacerbated by the complex interactions in the region. The exact dependence of  $\text{O}_3$  on  $\text{NO}_x$ -  
and VOC-limited regimes varies greatly on assumptions and different conditions, hence, threshold criteria for transition  
regimes are likely to change depending on changes in emission rates and patterns (Zhang et al., 2023), which may create a  
shift in  $\text{O}_3$  regimes. Thus, we need an accurate modeling interpretation of chemical and physical processes to more accurately  
determine  $\text{O}_3$ - $\text{NO}_x$ -VOCs sensitivity.

95 Since  $\text{O}_3$ - $\text{NO}_x$ -VOCs sensitivity is mostly determined from photochemical air quality models (Sillman et al., 2003; Song et  
al., 2010; Li et al., 2011; Goldberg et al., 2016; Du et al., 2022), accurate modeling representations of chemical and physical  
processes are crucial to better determine  $\text{O}_3$  formation regime, thus more effectively supporting ozone mitigation strategies in

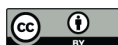

Houston. However, previous model-based studies are subject to large uncertainties from simulated O<sub>3</sub> concentration and its precursors. The diurnal evolution of the PBL can significantly influence the mixing, transport, and chemistry of pollutants (Miao et al., 2019; Xiang et al., 2019), and thus must be accurately resolved in modeling. Based on previous studies, turbulence results in reductions of chemical reaction rates in the boundary layer, as a result of negatively correlated concentrations and vertical velocities (Li et al., 2016). Stockwell (1995) showed turbulence causes a non-uniform mixing of gas-phase trace species, thus limiting the accuracy of chemical models. This is particularly true if the model resolution is too coarse to resolve heterogeneous urban emissions and wind flows (Chen et al., 2009; Uebel and Bott, 2018). Also, these chemical models cannot adequately resolve the concentration and transport of O<sub>3</sub> pollutants in convective, unstable atmospheres due to a misrepresentation of boundary layer evolution (Li et al., 2016; Cuchiara et al., 2014). In a recent study, Wang et al. (2023) showed an improved modeling-observation agreement of the spatial and vertical distributions of key chemical species (e.g., O<sub>3</sub>, NO and NO<sub>2</sub>) from large eddy simulation (LES) compared with mesoscale simulations, indicating LES is an effective tool to resolve turbulence effects on chemical reactions. WRF-LES-Chem is advantageous due to its potential to improve the physical and chemical processes of pollutants at different scales.

In this work, we perform high-resolution simulations using WRF-LES-Chem over an O<sub>3</sub> exceedance period in September 2021 during the TRACER-AQ experiment, aiming to provide a comprehensive understanding of photochemical and physical processes involved in O<sub>3</sub> formation over Houston. Recent modeling studies have investigated ozone episodes during the TRACER-AQ campaign (Soleimanian et al., 2023; Li et al., 2023; Liu et al., 2023). This work expands upon those efforts by applying higher resolution LES simulations on the particular case day of September 8, 2021. Model results are comprehensively validated utilizing long-term ground-based observations from the TCEQ monitoring stations, measurements from the TRACER-AQ campaign, and observations from ground-based Pandora spectrometers to ensure modeling accuracy. This study also assesses spatial and temporal variability of the O<sub>3</sub> formation regime and investigates AOC, which can provide useful information to environmental managers to better control O<sub>3</sub> pollution over Houston.

## 2. Methodology

### 2.1 Model description and set-up

#### 2.1.1 Dynamic settings

We use the WRF-Chem model (Grell et al., 2005; Fast et al., 2006) version 4.4 with the integrated rate reactions capability that allows for the investigation of specific chemical pathways. Since LES is better suited to represent the PBL evolution and the transport of large eddies, we use a WRF-LES-Chem approach to simulate the concentration and transport of O<sub>3</sub> pollutants in convective, unstable atmospheres evolution (Li et al., 2016; Wang et al., 2023). Our modeling consists of four domains (D01 – D04) with horizontal grid resolutions of 8.1 km, 2.7 km, 900 m, and 300 m from outermost to innermost domains on a Lambert conformal projection (Fig. 1). The first three domains (D01 – D03) represent mesoscale setups while the innermost

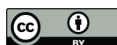

domain (D04) is the LES domain. While the ideal LES resolution may range from 100 m and below, we select a 300 m  
 130 resolution due to the computational feasibility of our study that aims to better account for both boundary layer dynamics and  
 detailed atmospheric chemistry, as used in other literature (e.g., Wang et al., 2023). At this resolution, we aim to reach a  
 compromise between model computational efficiency and model resolution, since LES at finer scale resolutions are otherwise  
 too computationally expensive, especially given the size of our innermost domain that aims to focus on most of the Houston  
 area. The LES domain extends over the Houston urban area, including all TRACER-AQ measurement stations and Houston  
 135 Ship Channel, and includes 427 x 415 grid cells horizontally. A two-way nesting approach (the inner domain provides feedback  
 to the outer domain) is set up between the domains. We perform two simulations where a two-way nesting between domains  
 D01 and D02 is used to drive another two-way nested simulation between domains D03 and D04. The simulations are  
 performed at a time step integration of 24 seconds and 1.8 seconds, respectively. The vertical layers comprise of 61 levels  
 across all domains with the lowest layer within ~20 m near the surface, and include 25 layers located within the PBL to resolve  
 140 boundary layer processes (~1.5 km). The vertical grid spacing gradually increases up to the top of the model at 50 hPa.

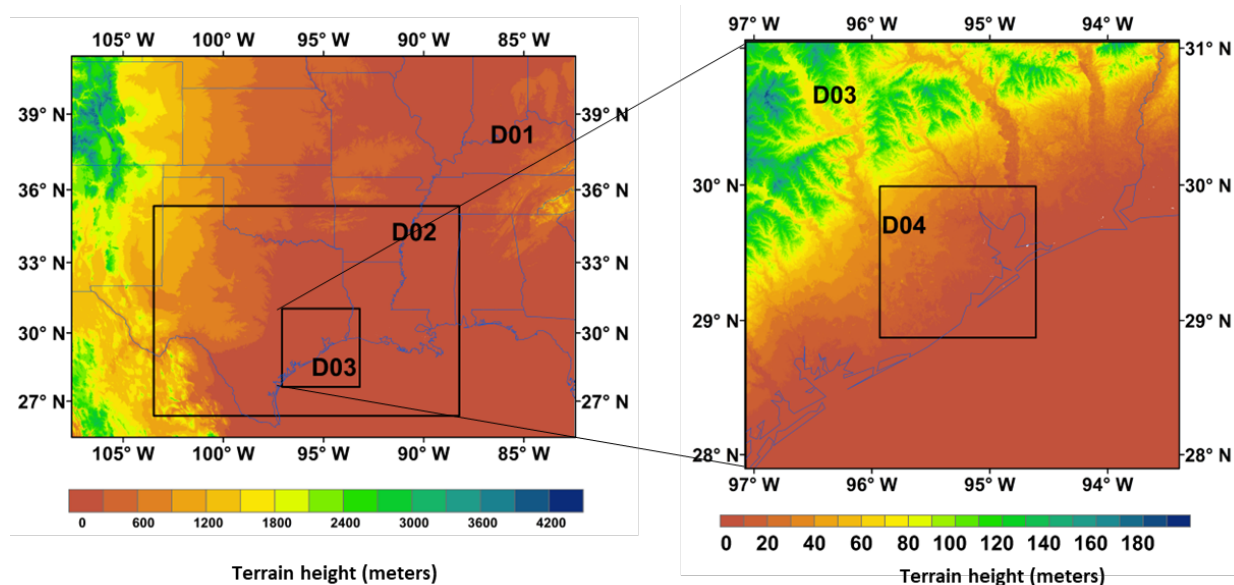

**Figure 1: The four-layer domain setup with the background contour showing average topography.**

To better examine chemical processes in a complex, dynamic urban atmosphere like Houston, a more accurate meteorological  
 145 product is needed to drive the simulations. We therefore examine model sensitivity to meteorological initial and boundary (IC  
 & BC) conditions from the High-Resolution Rapid Refresh (HRRR; Dowell et al., 2022) and the Final Operational Global  
 Analysis (NCEP-FNL; NCEP, 2000) data, with these two meteorological products widely used in previous studies (Jiménez  
 et al., 2022; Pinto et al., 2021; Gholami et al., 2021) (Fig. S1). NCEP-FNL has a spatial resolution of 1° x 1° and is provided  
 at a 6 h interval. HRRR is provided at a horizontal grid spacing of 3 km and available every 1 h up to 48 h forecasts. We  
 150 perform a two-way nested simulation using domains D01 and D02 without chemistry to test the performance of both FNL and



HRRR as IC & BC. The simulation extends from September 6, 2021 (00:00 UTC; September 5, 19:00 CDT) to September 9, 2021 (00:00 UTC, September 8, 19:00 CDT). Our model results, driven by the two datasets show similar spatial distributions of the surface heat budget (Fig. S1). We also show a wind rose diagram which gives a succinct view of how wind speed and direction are typically distributed at a particular location. Here, a prevailing north-westerly wind based on the TCEQ in-situ observations is observed. The model results driven by the NCEP-FNL more closely matches the TCEQ observed north-westerly wind than HRRR.. Wind fields are key parameters to determine the transport and mixing of pollutants. Hence, although HRRR has a much higher spatial resolution, we select the NCEP-FNL meteorological product to provide a more realistic dynamic field in our simulations.

Key physical parameterizations in our modeling include: the Rapid Radiative Transfer Model for GCMs (RRTMG) scheme for longwave and shortwave radiation (Iacono et al., 2008), Morrison double moment scheme for cloud microphysics (Morrison et al., 2009), the Noah land surface model (Chen and Dudhia, 2001), and the revised MM5 Monin-Obukhov for the surface layer scheme (Jiménez et al., 2012). The Grell 3D scheme (Grell and Dévényi, 2002) is used for cumulus parameterization to resolve sub-grid cloud processes for coarser resolution (D01 and D02), while it is turned off for D03 and the LES (D04) domain. We use the Yonsei University PBL scheme (YSU; Hong et al., 2006) to parameterize the sub-grid scale turbulent fluxes within the PBL for the mesoscale domains. YSU represents a non-local and first-order closure scheme to estimate turbulent diffusion, where vertical diffusion is expressed as a function of a non-local gradient adjustment term. This PBL option is turned off for the LES domain to resolve large eddies directly, however, finer-scale eddies are resolved by the three-dimensional 1.5 order turbulent kinetic energy (TKE) closure (Deardorff, 1970).

Simulations for the mesoscale domains (D01 – D02) cover the period from September 6, 2021 (00:00 UTC) to September 9, 2021 (00:00 UTC), which corresponds to Houston’s local time from September 5, 2021 (19:00 Central Daylight Time, CDT) to September 8, 2021 (19:00 CDT), with the first 20 hours as the spin-up time. The output was used to drive parallel simulations for D03 and the LES domain and cover the period from 11:00 to 21:00 UTC (06:00 – 16:00 CDT) on September 8, 2021.

### 2.1.2 Chemistry settings

Our study adopts the recent MOZART (Model of Ozone and Related Chemical Tracers) tropospheric chemistry scheme (T1; Emmons et al., 2020) to represent the gas-phase chemistry. MOZART-T1 is a more comprehensive chemistry scheme compared with previous versions. It includes 151 gas-phase chemical species, 65 photolysis reactions and 287 kinetic reactions. Compared to previous versions of the MOZART scheme, specific modifications are made to the oxidation of isoprene and terpenes in MOZART-T1, as well as the speciation of aromatic and organic nitrate to improve the representation of O<sub>3</sub> and secondary organic aerosol (SOA) precursors (Emmons et al., 2020). The Tropospheric Ultraviolet-Visible (TUV; Tie et al., 2003) transfer scheme is used for the estimation of photolysis rates. We also use output from the Community Earth System Model - Whole Atmosphere Community Climate Model (CESM2-WACCM; Liang et al., 2022; Gettelman et al., 2019) as the IC and BC of chemical species in our simulations. Initial conditions and boundary conditions for each nested domain are generated from the parent domains, which are produced by the 8.1 km simulation. The Model of Emissions of Gases and



Aerosols from Nature (MEGAN; Guenther et al., 2006) and the 2017 US EPA National Emissions Inventory (NEI; Reff et al., 2020) are used as biogenic and anthropogenic emissions, respectively, while the recent release of the Fire Inventory from NCAR (FINNv2.5; Wiedinmyer and Emmons, 2022) is used to provide fire emissions and biomass burning. NEI emissions data consists of point and non-point sources at a 12-km resolution and are downscaled to respective model resolutions for inner domains through WRF nesting. Emissions from MEGAN and FINN are available at a base resolution of 1 km, and all emission inventories are mapped to the same resolution for each of the domains. Our simulation results with the 2017 NEI show overestimated NO<sub>x</sub> concentrations, as found in previous urban studies (Choi and Souri, 2015; Souri et al., 2016a; Silvern et al., 2019; Herrmann and Gutheil, 2022). To more accurately represent emissions during the high ozone episode in Houston, we compare simulated concentrations of NO and NO<sub>2</sub> with their observations from TRACER-AQ and develop scaling factors of 0.3 and 0.2, respectively, to adjust NEI emissions of NO and NO<sub>2</sub>. The total NO<sub>2</sub> emission over Houston accounts for 11.32 % of the total emitted NO<sub>x</sub> based on the NEI over the study period. On average, the diurnal pattern of the rescaled NO<sub>x</sub> emission is characterized by high early morning emissions at ~0.65 mol km<sup>-2</sup> h<sup>-1</sup> and then peaks in the late afternoon at ~0.74 mol km<sup>-2</sup> h<sup>-1</sup>. The results we show in this study are based on simulations with the scaled NO<sub>x</sub> emissions. While existing studies show large uncertainties in previous versions of FINN which may result from the coarse resolution of the active fire product (Faulstich et al., 2022; Liu et al., 2020), the improved spatial resolution of the VIRS product in the FINNv2.5 provides more sensitive detection of fires at local and regional scales to minimize the estimated emission uncertainties (Wiedinmyer et al., 2023).

## 2.2 Observational data

### 2.2.1 TRACER-AQ airborne observations

The NASA TRACER-AQ experiment aimed to provide a robust understanding of how pollutants vary spatially, vertically and temporally over the Houston region. A wide range of instruments were operated during TRACER-AQ, which generated large measurement datasets from airborne, ship-based, mobile and stationary ground platforms (Knapp and Boyer, 2022; Griggs et al., 2024). Continuous atmospheric profile measurements from Sondes and Lidar provide unique and valuable data to understand the variability of pollutant profile and column concentrations (Gronoff et al., 2019). We use measured vertical distributions of temperature, relative humidity, wind speed, potential temperature, and ozone from field ozonesondes, which were launched from Galveston Bay and La Porte stations (see Fig. 2) on 8 September 2021 at 12:47 CDT and 13:07 CDT, respectively. Since the balloon drifts during its ascent in response to background winds, we use the nearest model grids along the sounding trajectory for accurate comparison.

### 2.2.2 TCEQ and Pandora ground station measurements

In-situ measurements from 18 Texas Commission on Environmental Quality (TCEQ) stations are used to evaluate our simulated surface meteorological fields (temperature, wind speed, vertical velocity and water vapor) and pollutant (O<sub>3</sub>, NO<sub>2</sub>)





215 concentrations. Data from 67 stations in Houston are available in the TCEQ Texas Air Monitoring Information System (TAMIS) database at every hour. Data coverage from TCEQ stations is widely used in previous studies for VOCs, hydrocarbon and meteorology monitoring (Schade and Roest, 2018; Vizuete et al., 2022).

We also use level 2 (L2) data products retrieved from the two Pandora spectrometers in La Porte (29.67° N; 95.06° W) and the University of Houston (UH; 29.72° N; 95.34° W), including column concentrations of O<sub>3</sub> as well as surface concentrations of  
220 HCHO and NO<sub>2</sub> (Fig. 2). Pandora spectrometers directly use the differential optical absorption spectroscopy (DOAS) method to obtain slant column density from measured solar irradiances, and translated to estimate the tropospheric column of pollutant variables (Platt and Stutz, 2008; Herman et al., 2009, 2018; Thompson et al., 2019). Since light detected by Pandora spectrometer systems can transverse through different paths depending on the observation geometry, it allows the detection of trace gas absorption at various altitudes. Previous studies found good agreements between Pandora measurements and  
225 calibrated in-situ measurements as well as between Pandora and satellite retrieved data products (Baek et al., 2017; Martins et al., 2016; Thompson et al., 2019; Spinei et al., 2018). The sky-scanning properties of the Pandora spectrometer are critically sensitive to trace gases absorptions in the lower atmosphere and can be used to measure the tropospheric column of NO<sub>2</sub> and HCHO (~4 km top of atmosphere; TOA), while measurements at large zenith direction provide information on O<sub>3</sub> stratospheric gas absorption properties.

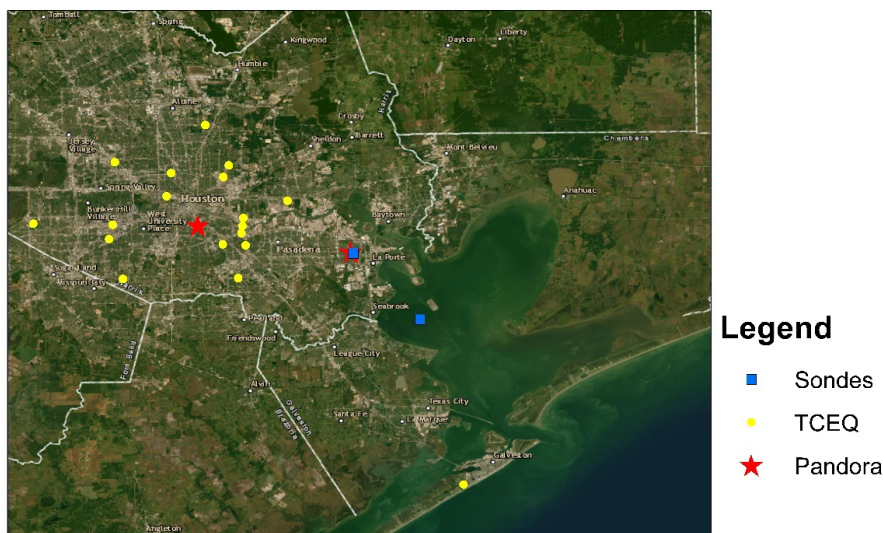

230

**Figure 2: Locations of the TCEQ monitoring stations, TRACER-AQ sondes and Pandora spectrometers in the Houston region (Credits for the background image: Esri, HERE, Garmin, © OpenStreetMap contributors, and the GIS user community).**

### 2.3 O<sub>3</sub> production rate and sensitivity regime

In daytime photochemical reactivity, the O<sub>3</sub> production rate (PO<sub>3</sub>) is primarily dependent on NO<sub>2</sub> production from the reactivity  
235 of NO with RO<sub>2</sub> and HO<sub>2</sub> radicals. In contrast, the loss of O<sub>3</sub> depends on the photolysis of O<sub>3</sub>, the formation of nitrate acid from OH and NO<sub>2</sub>, and the ozonolysis of alkenes. Overall, we estimate net PO<sub>3</sub> using Eq. 1 as defined by Mazzuca et al. (2016).



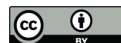

$$\begin{aligned}
 \text{Net } P(O_3) = & k_{HO_2+NO}[HO_2][NO] + \sum k_{RO_{2i}+NO}[RO_{2i}][NO] \\
 & - k_{OH+NO_2}[OH][NO_2][M] - P(RONO_2) - k_{HO_2+O_3}[HO_2][O_3] \\
 & - k_{OH+O_3}[OH][O_3] - k_{O(1D)+H_2O}[O(1D)][H_2O] - L(O_3 + \textit{alkenes})
 \end{aligned} \tag{1}$$

Here, the  $k$  terms represent the reaction rate coefficients;  $RO_{2i}$  is the individual organic peroxy radicals. Several indicators are used to determine the response of  $O_3$  production to  $NO_x$  and VOC emissions, thus to determine  $NO_x$ -limited and VOC-limited regimes for  $O_3$  formation. More predominantly used methods include the ratio of the rate of radical loss via  $NO_x$  reaction ( $L_N$ ) to the total primary radical production ( $Q$ ) (Mazucca et al., 2016; Zhou et al., 2014; Yu et al., 2020; Zhang et al., 2023) and HCHO to  $NO_2$  ratio (FNR; Duncan et al., 2010; Jin and Holloway, 2015; Schroeder et al., 2017; Goldberg et al., 2022; Chen et al., 2023). As proposed by Kleinman (2005),  $L_N/Q$  can be calculated by dividing the rate of radical loss via  $NO_x$  reaction ( $L_N = R_4 + R_5 + R_{6a} - R_{6b}$ ) by the total of primary radical productions ( $Q = 2*R_1 + 2*R_2 + R_3$ ). The photodissociation of  $O_3$  and HCHO represent the primary pathways for the production of  $HO_x$  ( $HO_2 + OH$ ) radicals (R1-R3), while radical termination through  $NO_x$  is summarized in R4-R6. A reactivity-weighted threshold of 0.5 indicates the transition between a VOC-limited regime and a  $NO_x$ -limited regime, with  $L_N/Q < 0.5$  representing a  $NO_x$ -limited regime, while  $L_N/Q > 0.5$  indicating a VOC-limited regime (Kleinman et al., 2001; Kleinman, 2005).

#### Radical Initiation:

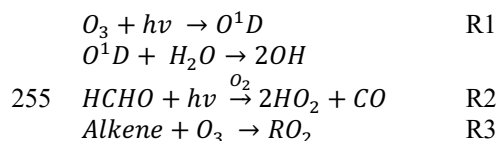

#### Radical loss via $NO_x$ :

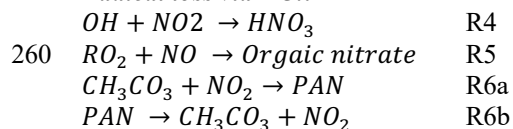

Research on FNR as an indicator for  $PO_3$  uses HCHO as an estimate of the oxidation of short-lived VOC emissions (Duncan et al., 2010). In their study, HCHO and  $NO_2$  are retrieved from satellite instruments; hence this ratio is introduced as a non-local or regional proxy for the chemical regime (Duncan et al., 2010). Previous studies have adopted varying FNR threshold values to indicate  $NO_x$  or VOC-limited regimes in regions with distinct emission characteristics (Wang et al., 2021; Chen et al., 2023). In a heavily polluted environment from HRVOC emissions, the assumption of HCHO as a proxy for short-lived VOCs may not hold, thus affecting the FNR threshold (Schroeder et al., 2017; Souri et al., 2020). For example, when a large influx of HRVOC emissions is introduced in a heavily polluted atmosphere, radical species and  $NO_x$  partitioning reach new steady state concentrations faster while HCHO may be slower to respond, which temporarily reduces the ability of HCHO to act as a proxy until it reaches a new steady state (Schroeder et al., 2017). Tonnesen and Dennis (2000) used a threshold of 1.0 to estimate the transition of the two regimes over the New York area. Duncan et al. (2010) assumed a VOC-limited regime when  $FNR < 1.0$  and a  $NO_x$ -limited when  $FNR > 2.0$ , which are also adopted in other studies (Tang et al., 2012; Jin and



275 Holloway, 2015; Chen et al., 2023). There is still a high uncertainty relating to the transition threshold between the two regimes for FNR, and peak values of FNR may reach up to ~6 in southeastern US cities (Li et al., 2022). Hence, we apply both the FNR and  $L_N/Q$  methods to examine  $O_3$  formation regimes and use the  $L_N/Q$  to investigate the FNR transition threshold in the Houston area. Calculations are conducted using model results.

## 2.4. Model evaluation metrics

280 To quantitatively evaluate the reliability of the model, we calculate the mean absolute error (MAE) and root mean square error (RMSE) for the comparison of modeled results with TCEQ observations. All comparisons are made on time-paired data for air temperature, wind speed,  $O_3$  and  $NO_2$  across selected stations. MAE and RMSE are calculated using the following equations:

$$MAE = \frac{\sum_{i=1}^n |y_i - x_i|}{n} \quad (2)$$

285

$$RMSE = \sqrt{\frac{\sum_{i=1}^n (y_i - x_i)^2}{n}} \quad (3)$$

where  $y_i$  and  $x_i$  are time-paired model and TCEQ observation values.

## 3. Results

### 3.1 Spatial distributions

Since local production of  $O_3$  is also influenced by temperature and water vapor (Kleinman, 2005; Duncan et al., 2010), it is important to capture the accurate representation of the meteorology. Thus, we first investigate horizontal distributions of simulated key meteorological fields, including temperature, horizontal and vertical wind speed, and water vapor mixing ratio near the surface across in model domains D02 and D04 on September 8, 2021. As we apply an online two-way coupling that allows feedback between the intermediate domain D03 and the LES domain D04, results from the mesoscale D03 are modified by feedback from the LES thus these two domains show similar spatial characteristics. D03 results are therefore not shown nor further discussed. Two time slices, including 09:00 CDT (Fig. S2) and 15:00 CDT (Fig. 3), are selected to represent distinct convective hours. Here, meteorological conditions reveal that warm, moist air prevails in the broad Houston region during the morning, while hot, drier air with prevailing northerly winds dominate the inland Houston during the afternoon. From 09:00 CDT to 15:00 CDT, increasing solar radiation drives a more dynamic boundary layer, with temperature, wind speed and water vapor mixing ratio all demonstrating more heterogeneities in the afternoon. We therefore show maps of the meteorological fields at 15:00 CDT here but keep the 09:00 CDT fields in the Supplementary Materials as a reference. At both times, model generally overestimates (underestimates) temperature (horizontal wind speed), although the results from the LES domain show better agreements with observations from the TCEQ stations than the results from the mesoscale D02 simulation, especially at 15:00 CDT under a more developed PBL condition. The post-sunrise (9:00 CDT) surface temperatures are relatively low and

295

300



305 exhibit homogeneous distributions both inland and over the sea. As the day progresses into the afternoon, surface temperature  
 rises over land due to increased solar radiation, with higher temperatures dominating the Central Houston region due to the  
 impact of the urban heat island (Marsha et al., 2018). Vertical wind speed also indicates enhanced daytime convective updrafts  
 at the surface in the LES domain compared to the mesoscale domains. In addition, both the mesoscale and LES results show  
 warmer biases compared to observations, though the LES domain D04 has lower RMSE of 2.39 °C and 2.74 °C for temperature  
 at the Deer Park and Clinton stations compared to 2.57 °C and 3.53 °C from the mesoscale domain D02 (Table S1). Similarly,  
 310 compared with the observed average wind speed of 4.67 m s<sup>-1</sup>, MAE values show a lower model bias for the LES at 2.42 m s<sup>-1</sup>  
 than 2.91 m s<sup>-1</sup> for the mesoscale domain at the Clinton station. While turbulence may be better resolved at finer LES  
 resolutions (Wang et al., 2023), our LES results with a horizontal spacing of 300 m demonstrate reasonable capacity to resolve  
 PBL dynamics as in Lebo and Morrison (2015) and Grant et al. (2022).

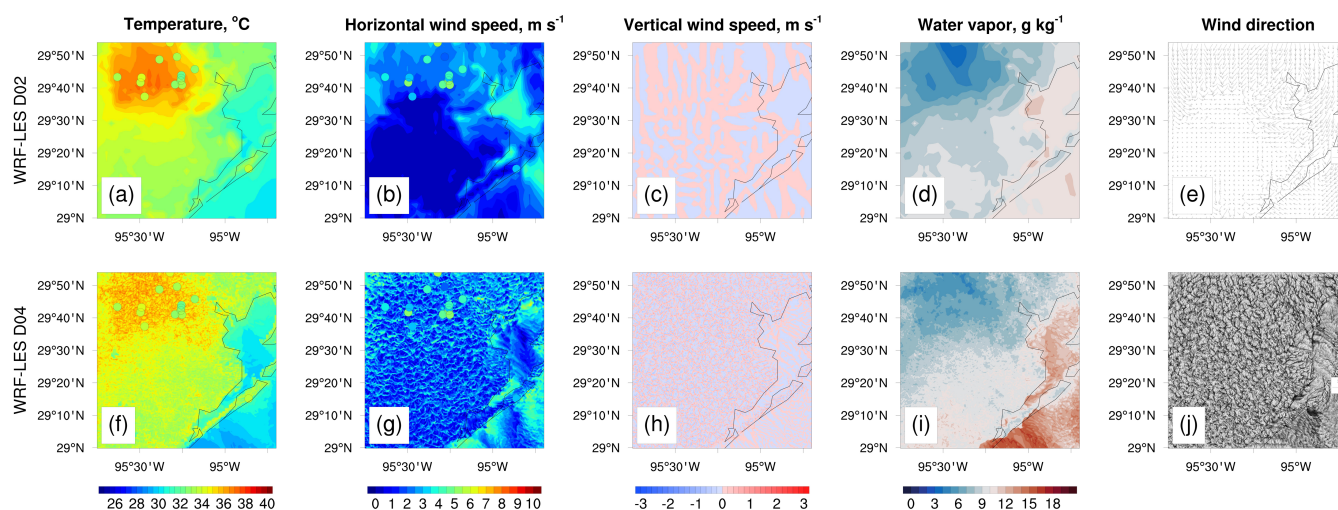

315

**Figure 3: Contour maps are horizontal distributions of simulated temperature (first column), horizontal wind speed (second column), vertical wind speed (third column), water vapor (fourth column), and wind direction (fifth column) near the surface at 15:00 CDT for D02 (first row) and D04 (second row) simulations. Circled dots represent measurements from TCEQ stations.**

320 The near-surface concentrations of modeled O<sub>3</sub>, NO<sub>2</sub>, HCHO and isoprene during the afternoon (15:00 CDT) are shown in  
 Fig. 4. Overall, the model shows slight overestimation of simulated O<sub>3</sub>, NO<sub>2</sub>, and HCHO. However, the model captures well  
 the diurnal variations of these chemical species when compared with observations. In contrast to the LES domain D04, the  
 mesoscale domain D02 shows minimal spatial variation due to its coarse resolution. Like O<sub>3</sub>, the LES domain D04 shows  
 improved model resolving capacity for chemical species as they show the best agreement with observations in the morning  
 and afternoon hours. Peak O<sub>3</sub> concentrations occur around 15:00 CDT. While the LES domain (D04) slightly overestimates  
 325



observations of O<sub>3</sub> over Galveston Island by up to 10 ppb, our model results in D04 still demonstrate good agreement with observations from the majority of the TCEQ stations, particularly in the Central Houston region with a dense observation network. High NO<sub>2</sub> concentrations are both observed and simulated in the morning hours (Fig. S3), with a maximum surface concentration of 42 ppbv identified in Central Houston, resulting from road traffic emissions during rush hour (Souri et al., 2016b). In the late afternoon, the photolysis of NO<sub>2</sub> is enhanced, thus resulting in reduced NO<sub>2</sub> concentrations. Overall, the model captures NO<sub>2</sub> dominant zones within the Central Houston and the Houston Ship Channel areas, as their presence in the atmosphere is largely dependent on anthropogenic emissions. The statistical comparison of both the mesoscale and LES domains with TCEQ observations (Table S1) show an overestimation of O<sub>3</sub> mixing ratio, though LES simulates a lower bias (RMSE = 5.49 ppbv, MAE = 4.32 ppbv) compared to the mesoscale domain D02 (RMSE = 16.01 ppbv, MAE = 15.05 ppbv) at the Deer Park station. Like O<sub>3</sub>, the LES results exhibit lower biases at both stations for NO<sub>2</sub> when compared with the TCEQ observations. Although the LES performs better, the results in this domain still show biases, which are likely induced by the uncertainties and coarser resolutions of the emissions inventories used in this study (Herrmann and Gutheil, 2022). Also, the temporal variability of the WACCM boundary conditions used in our simulations may introduce transport errors as identified in other regional modeling studies (Tang et al., 2023). In contrast to NO<sub>2</sub>, HCHO follows an opposite diurnal pattern with lower concentration in the morning hours and higher concentration in the afternoon due to photochemical reactions of primary and oxygenated VOCs (Zhang et al., 2022). The temporal distributions of NO<sub>2</sub> and HCHO are different as afternoon HCHO is a product of emitted HCHO and secondary HCHO produced from other precursors, thus higher in the afternoon when atmospheric oxidation is high (Nowlan et al., 2018). Isoprene, a major precursor to daytime O<sub>3</sub> production, shows higher concentrations in the late afternoon (Fig. 4), as the biogenic emissions are dependent on temperature and light (Rinne et al., 2002; Guenther et al., 2006; Zeng et al., 2023). In addition, surface and column concentrations of NO<sub>2</sub>, HCHO and O<sub>3</sub> from Pandora spectrometers are used to evaluate the model's performance as shown in the Supplementary Materials (Fig. S4). We also see the LES domain D04 show improved column concentration of HCHO, NO<sub>2</sub> and O<sub>3</sub>, which is consistent with the diurnal variations of the pollutants from the Pandora spectrometers.

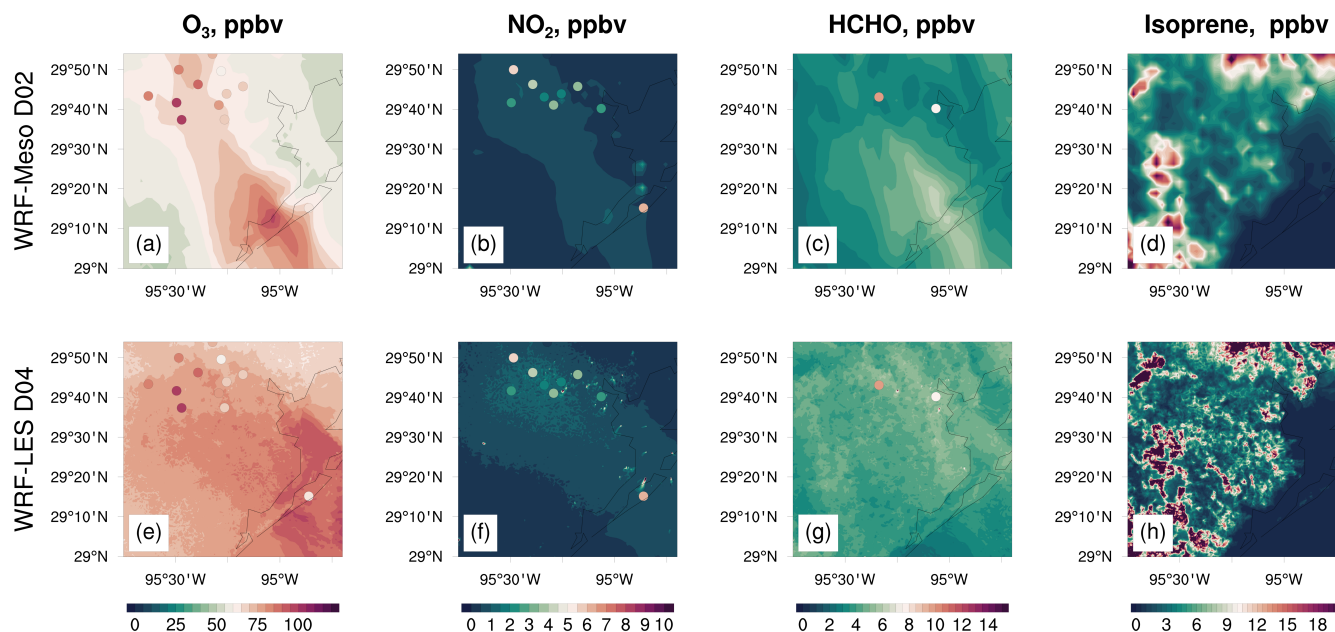

350 **Figure 4: Contour maps are horizontal distributions of simulated O<sub>3</sub> (first column), NO<sub>2</sub> (second column), HCHO (third column) and isoprene (fourth column) near the surface at 15:00 CDT for D02 (first row) and D04 (second row) simulations. Dots represent TCEQ observations of O<sub>3</sub> and NO<sub>2</sub> and Pandora observations of NO<sub>2</sub> and HCHO. Isoprene and other key VOCs are validated separately.**

To understand O<sub>3</sub> formation, an accurate model interpretation of its VOC precursors is needed. We, therefore, validate our modeled VOCs by comparing key VOCs that are measured by the Proton Transfer Reaction – Mass Spectrometry (PTR-MS) at San Jacinto Battleground State Historical site (29.753 °N, 95.091 °W), a TRACER-AQ site (Fig. 5). The comparison results indicate the model adequately reproduces observations, with results from the LES domain D04 better matching observed VOCs, especially for acetaldehyde, isoprene, HCHO, methyl ethyl ketone (MEK), toluene and xylenes. Although acetone is largely underestimated in the mesoscale D02 simulations, the LES results better reproduce observations. We also acknowledge that the difference in measurement time (30 s) and model average time (1 h), as well as representing a station with one model grid cell may account for further disparities between the model and station measurement. This intercomparison considers daytime VOC concentrations, while the San Jacinto site has previously reported anomalous, high isoprene and MEK concentrations overnight that may likely arise from anthropogenic activity instead of biogenic emission and oxidation (Shrestha et al., 2023). The daytime intercomparison here likely reflects the local biogenic contributions to isoprene.

365

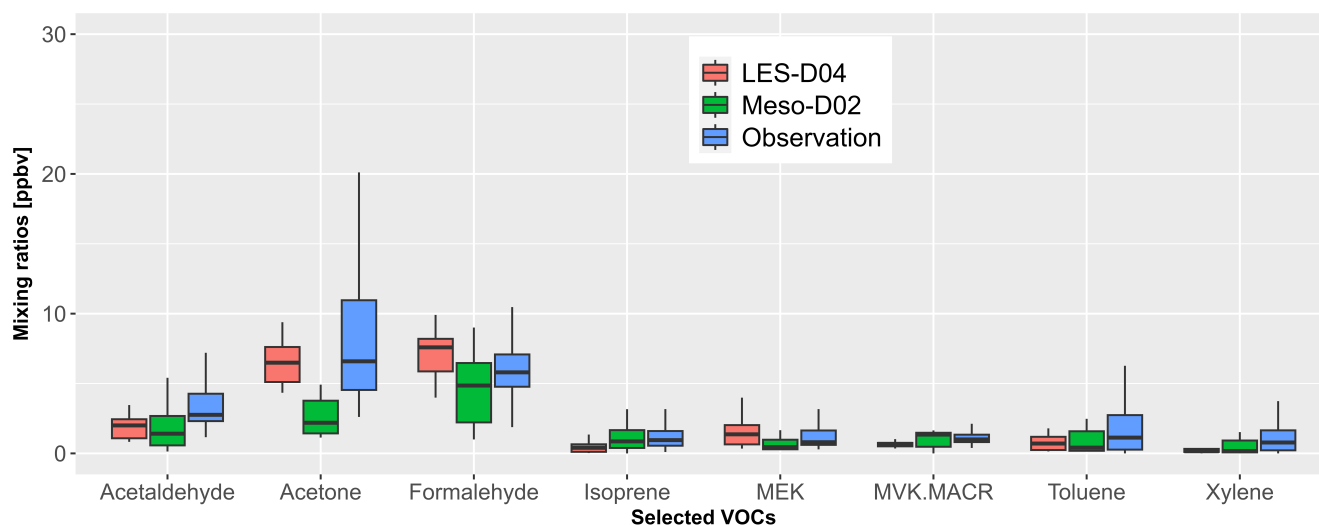

**Figure 5: Comparison of daily concentration averages (over 8:00 – 16:00 CDT) of selected VOCs from our simulations in D02 and D04 and measurements at the San Jacinto Battleground State Historical site.**

### 370 3.2 Vertical Profiles

We next examine simulated vertical profiles of key meteorological and chemical fields to study the role of boundary layer mixing in modifying surface levels of air pollutants. Simulated vertical profiles of  $O_3$  and key meteorological variables are compared with sonde measurements from TRACER-AQ over two launch sites, La Porte and Galveston Bay, as shown in Fig. 6. The trajectories of sondes can drift gradually from the launch sites to higher altitudes; therefore, simulation results aloft are selected according to sonde positions to minimize comparison bias of the vertical profiles. For potential temperature, the LES domain D04 provides a better match with observations than the mesoscale domain D02. Additionally, the LES domain D04 simulates a PBL height (PBLH) of approximately 1.3 km at the Galveston Bay launch site, comparable with sonde measurements of about 1.1 km (Fig. 6d). At the Galveston Bay site, the LES overestimates wind speed by  $\sim 3 \text{ m s}^{-1}$  near the surface and  $\sim 2 \text{ m s}^{-1}$  at 1.3 km altitude when compared to sonde observations. Similarly, from the surface to  $\sim 0.5 \text{ km}$  altitude, wind speed is also overestimated by the model by a maximum value of  $\sim 1.5 \text{ m s}^{-1}$ , a 30 % difference based on the observations at the La Porte site. For relative humidity, the model simulates contrasting patterns below and above  $\sim 1.3 \text{ km}$  altitude and underestimates relative humidity by 30 % below this transition altitude in the Galveston Bay region. Compared with the Galveston site, modeled vertical profiles of relative humidity depict smaller biases compared to observations at the La Porte site, with less bias from the LES domain than the mesoscale domain. The larger model-observation discrepancy at the Galveston station may be related to the proximity of the station to the open water surface of the Gulf of Mexico, as the rapid changes in air dynamics over the land-sea interface typically could not be accurately resolved through modeling (Ward et al., 2020). In addition, land surface parameterization in models in accurately modifying surface sensible and latent heat fluxes may vary over land and near water surfaces, thus further affecting simulated moisture metrics (Kantha Rao and Rakesh, 2019). Similarly, the NCEP-FNL meteorology at a  $1^\circ \times 1^\circ$  coarse resolution used to drive our modeling may also introduce simulated



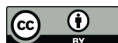

390 moisture bias at upper altitudes, which could primarily be due to inaccurate surface soil moisture that cannot be well represented at this coarse resolution (Ochsner et al., 2013).

The vertical structures of temperature show reasonable performance compared with observations at both sites, with the LES domain slightly performing better (+0.5 °C bias) than the mesoscale domain (+0.7 °C bias). Simulated O<sub>3</sub> profiles also show biases ~~comparing~~ with observed profiles. The LES domain D04 overestimates O<sub>3</sub> mixing ratio while the mesoscale domain  
395 D02 underestimates it over both sites. Discrepancies between model and observations may be attributed to the time lag between sonde measurements and simulation outputs. Minute-to-minute changes in wind speed and directions affect the distribution and dispersion of air masses (Li et al., 2019), thus the **time differences may** affect the model-observation comparison. In addition, the accuracy of reanalysis meteorological datasets, which are used to drive model simulations, in representing vertical profiles of key meteorological factors and their diurnal evolution may also contribute to the comparison discrepancy. We  
400 further investigate the temporal evolution of the vertical cross-section at the University of Houston and La Porte in the Supplementary Materials (Fig. S5) and show the LES domain captures the peak low-level O<sub>3</sub> concentration (96 ppb) between 18:00 UTC (13:00 CDT) and 21:00 UTC (16:00 CDT) when compared to ground-based Lidar measurements from TRACER-AQ (90 - 125 ppb).

In addition, we compare the evolution of O<sub>3</sub> and NO<sub>2</sub> vertical profiles from the mesoscale domain D02 and LES domain D04  
405 to show cross-domain differences in resolving variations of pollutants vertically (Fig. 7). As the day progresses, simulated O<sub>3</sub> mixing ratio near the surface increases, reaching up to 80 ppb in the LES domain in the late afternoon. In the early morning, O<sub>3</sub> increases while NO<sub>2</sub> decreases with height, indicating high O<sub>3</sub> accumulation aloft from the nocturnal stable layer and high NO<sub>x</sub> emissions from surface anthropogenic activities during morning rush hours. A more well-mixed atmosphere during the daytime then reflects higher dispersion of pollutants from the surface to aloft. The inter-domain comparison shows contrasting  
410 results in O<sub>3</sub> profile both below and above the PBL. O<sub>3</sub> in the LES domain D04 decreases with height within the PBL and gradually increases above 2 km, which is generally in line with lidar observations. **More inter-domain comparison of diurnal evolution of vertical profiles of key meteorological and chemical factors are shown in Fig. S6.** Following the comparative evaluation of the meteorology and chemistry across domains and between modeling and observations, the LES domain D04 provides a more realistic atmospheric condition.

415

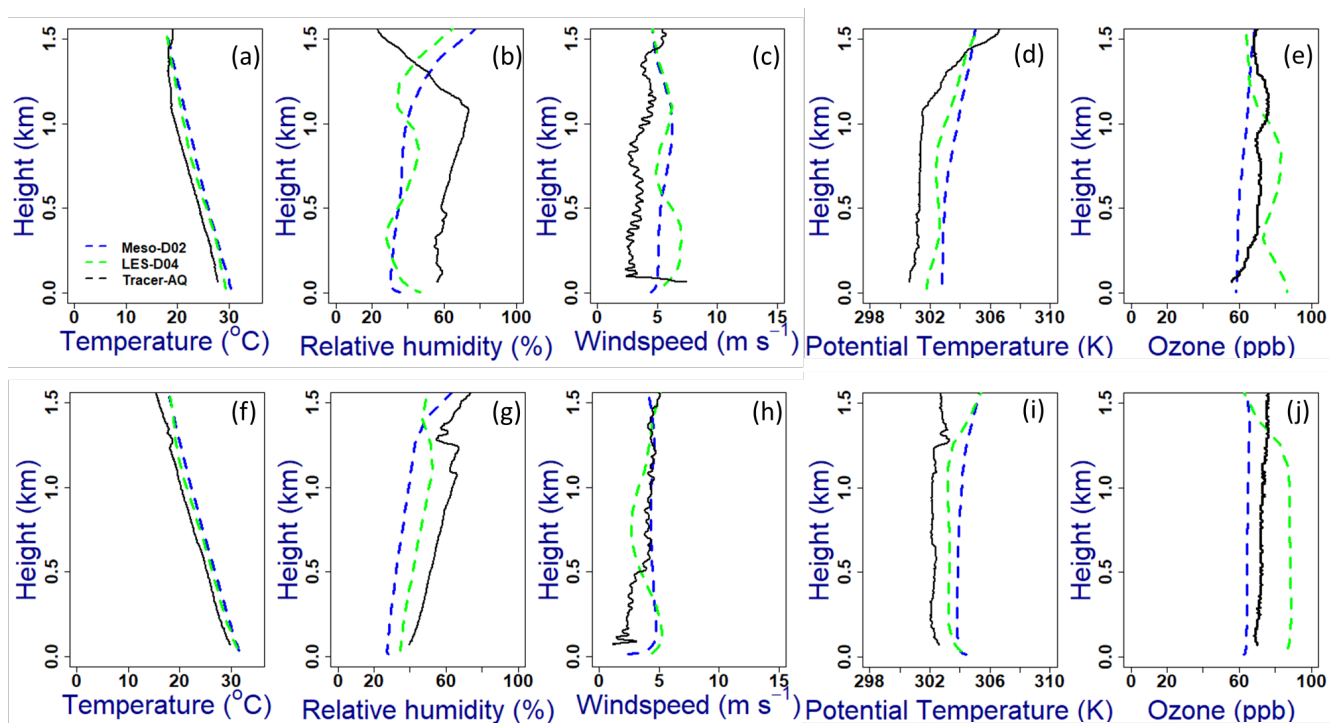

420 **Figure 6:** Comparison of vertical profiles of temperature, relative humidity, wind speed, potential temperature, and O<sub>3</sub> mixing ratio from the TRACER-AQ ozonesondes over Galveston Bay (12:47 CDT; a-e) and La Porte (13:07 CDT; f-j) with model results (13:00 CDT). The black lines represent observations; the blue dashed lines are for the D02 results with a resolution of 2700 m; the green dashed lines are for the LES D04 results with a resolution of 300 m.

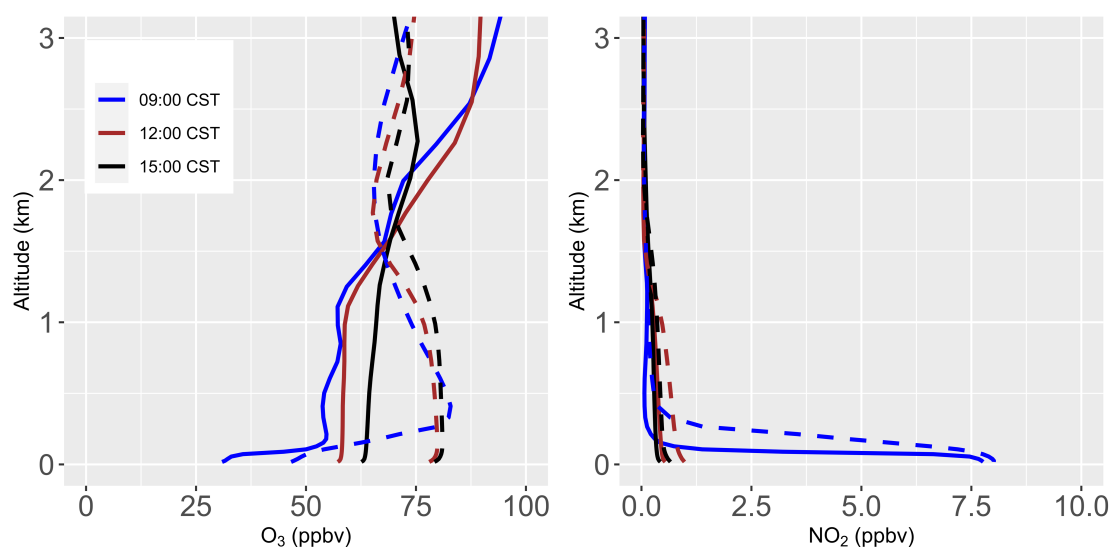

**Figure 7:** Domain-averaged vertical profiles of O<sub>3</sub> (left panel) and NO<sub>2</sub> (right panel) at 09:00 (blue), 12:00 (brown) and 15:00 CDT (black). Domain D02 results are shown as solid lines while the LES results over the D04 domain are represented as dashed lines.



### 425 3.3 O<sub>3</sub> formation regime

Next, we investigate the variability of O<sub>3</sub> production under different formation regimes. High O<sub>3</sub> production rate (P(O<sub>3</sub>)) occurs in the Central Houston region and extends towards the Houston Ship Channel during the daytime (Fig S7). Previous studies have found that O<sub>3</sub> formation is driven by a non-linear photochemical reaction under NO<sub>x</sub>-limited and VOC-limited regimes, and determined by different sensitivity indicators (Sillman et al., 2003; Ye et al., 2016). However, O<sub>3</sub> sensitivity indicators, including L<sub>N</sub>/Q and FNR, may vary spatially and at different times due to the spatial and temporal heterogeneity of total radical loss via NO<sub>x</sub> and radical production as well as the mixing ratio of HCHO and NO<sub>2</sub> (Jin and Holloway, 2015). Figure 8 shows a spatial distribution of surface photochemical regimes associated with O<sub>3</sub> production from the simulated LES domain. Here, L<sub>N</sub>/Q indicates O<sub>3</sub> production is mainly a VOC-limited regime (L<sub>N</sub>/Q > 0.5) in the morning, and then transitions into a NO<sub>x</sub>-limited regime (L<sub>N</sub>/Q < 0.5) in the late afternoon. However, regions around Baytown, Texas City and Deer Park exhibit a VOC-limited or transitional regime also in the late afternoon. The FNR of the whole Houston area in the morning is less than 1.2, indicating that a VOC-limited regime is prevalent during this hour and a noontime transition into a NO<sub>x</sub>-limited regime is also observed. It is worth noting that the transitional regime between a VOC-sensitive and NO<sub>x</sub>-sensitive regime as defined by the FNR indicator varies with regions as described by Duncan et al. (2010). Previous findings by Schroeder et al. (2017) define the FNR transition regime over Houston between 0.7 < FNR < 2.0, based on the relative rate of radical termination from radical-radical interactions to radical-NO<sub>x</sub> interactions. The ratio of FNR changes in response to the changes in VOCs and NO<sub>x</sub>, and variations in NO<sub>2</sub> may have greater impacts on the ratio than variations in HCHO. Thus, it is difficult to define an explicit cut-off for the FNR transition regime based on fluctuations in NO<sub>2</sub>. Ambient changes in HCHO and NO<sub>2</sub> respond immediately to changes in emissions sources and FNR will change in accordance, depending on which is predominant. Thus, using the ratio of radical production through HCHO and loss through NO<sub>x</sub> provides a more useful determinant for estimating FNR transition ratio of O<sub>3</sub> sensitivity. Hence, using model estimated values of the transition regime from the L<sub>N</sub>/Q indicator, we calculated the threshold for FNR transition regime, and find a range of 0.6 < FNR < 1.8 lies in the transition regime zone. Based on the similarities in the radical indicator approach to define the FNR transition regime, our associated range of FNR values is fairly consistent with the range described by Schroeder et al. (2017).

The discrepancy in our work compared to other studies relating to the modeled P(O<sub>3</sub>) when using either L<sub>N</sub>/Q or FNR may be attributed to differences in model chemistry and spatial resolution. Previous studies from Ren et al. (2013) and Mazzuca et al. (2016) used a simplified alkene chemistry in the Carbon Bond mechanism, version 5 (CB05) and overpredicted O<sub>3</sub> production in the morning in locations where alkenes dominate VOC reactivity. The alkene chemistry from the MOZART-T1 chemical mechanism used in our work considers relative alkene contributions from biogenic sources (Emmons et al., 2020), which is not often considered in other chemical mechanisms.

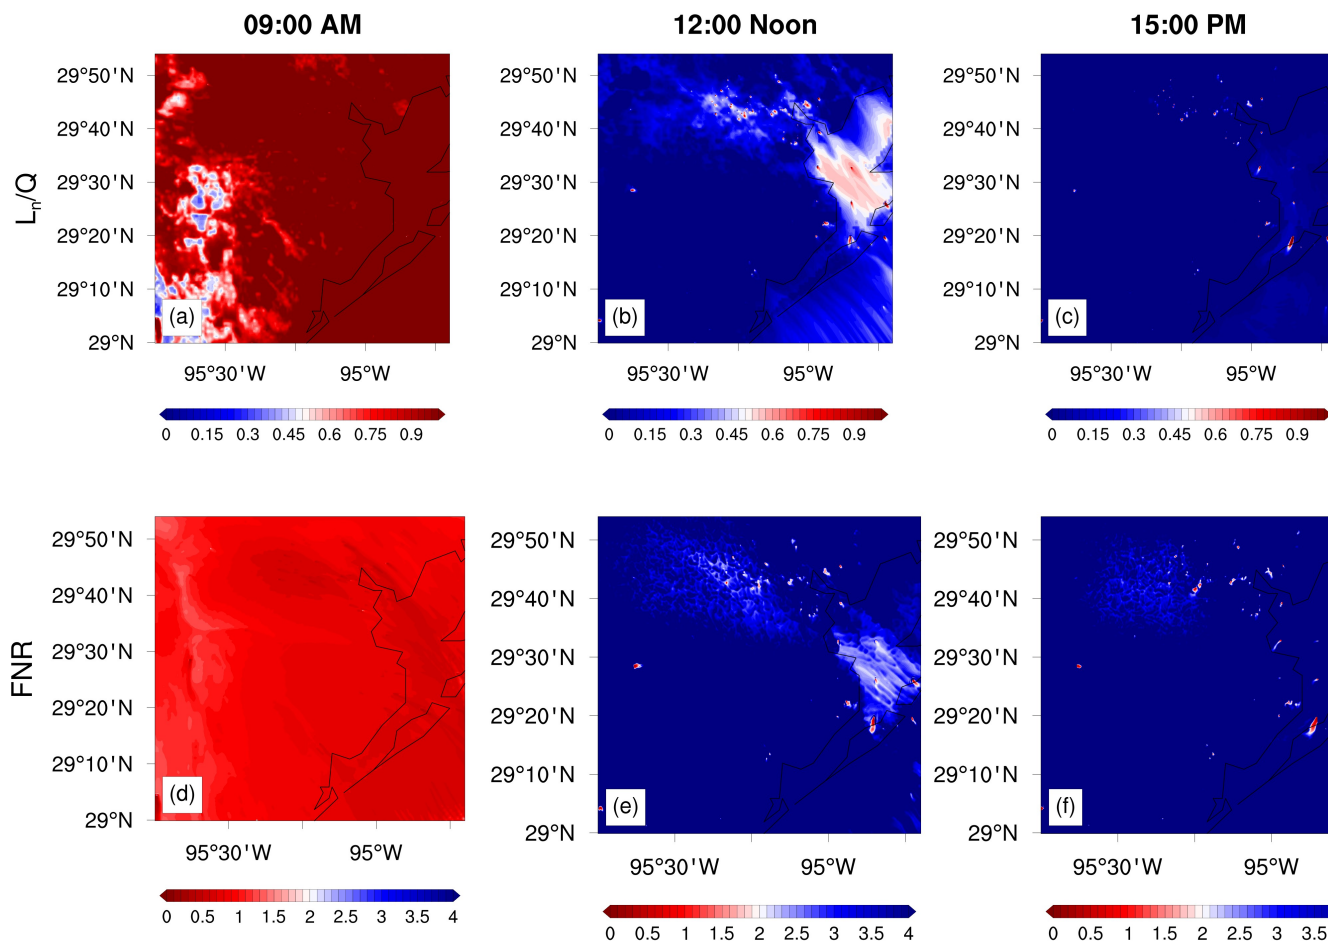

455

**Figure 8: Spatial distributions of the O<sub>3</sub> formation regime determined by L<sub>N</sub>/Q (upper panel) and FNR (lower panel) at 09:00 CDT, 12:00 CDT and 15:00 CDT. Calculated based on results from the LES domain over Houston.**

The non-linear process of NO<sub>2</sub> and HCHO in relation to O<sub>3</sub> formation and sensitivity regimes is further discussed in Fig. 9 from the model simulations. In Fig. 9, PO<sub>3</sub> describes the rate of ozone production under different sensitivity regimes at specific diurnal hours while O<sub>3</sub> as a function of NO<sub>2</sub> and HCHO depicts the overall daytime concentration of O<sub>3</sub> under these regimes. In the morning, when NO<sub>2</sub> is high but HCHO is low, PO<sub>3</sub> is higher with increasing HCHO, indicating a VOC-limited regime. Though we note that the production rate of HO<sub>x</sub> (OH + HO<sub>2</sub>) radicals is lower than their loss rate during this period under high NO<sub>2</sub> concentrations, thus leading to a lower production of O<sub>3</sub> in the morning than in the afternoon. In the Supplementary Materials (Fig. S8), the maximum net PO<sub>3</sub> in the morning is estimated at 10 ppb h<sup>-1</sup> over the whole of Houston. In contrast, during the afternoon when NO<sub>2</sub> is low but HCHO is high, PO<sub>3</sub> increases with increasing NO<sub>2</sub> levels and indicates a NO<sub>x</sub>-limited regime. During this period, the rate of HO<sub>x</sub> radical production is higher following the oxidation of VOCs by OH, thus

465



enhancing  $PO_3$  in the afternoon. An increase in  $HO_2$  reaction rate under a  $NO_x$ -limited regime leads to the enhancement of  $O_3$  production (Li et al., 2023). The dependence of  $O_3$  concentrations on  $NO_x$  levels during daytime chemistry shows that the  $O_3$  mixing ratio is a maximum when  $NO_x$  levels are low ( $< 10$  ppbv; Fig. S8).  $PO_3$  reaches  $50$  ppb  $h^{-1}$  in the late afternoon, which is higher than the average afternoon  $O_3$  production of  $20 - 30$  ppb  $h^{-1}$  observed during the DISCOVER-AQ campaign (Mazuca et al., 2016). This further shows the high  $O_3$  production during the TRACER-AQ campaign in 2021. The distinction, however, between these photochemical regimes is not simple and may be influenced by meteorology or unique environmental characteristics (De Foy et al., 2020; Li et al., 2023).

475

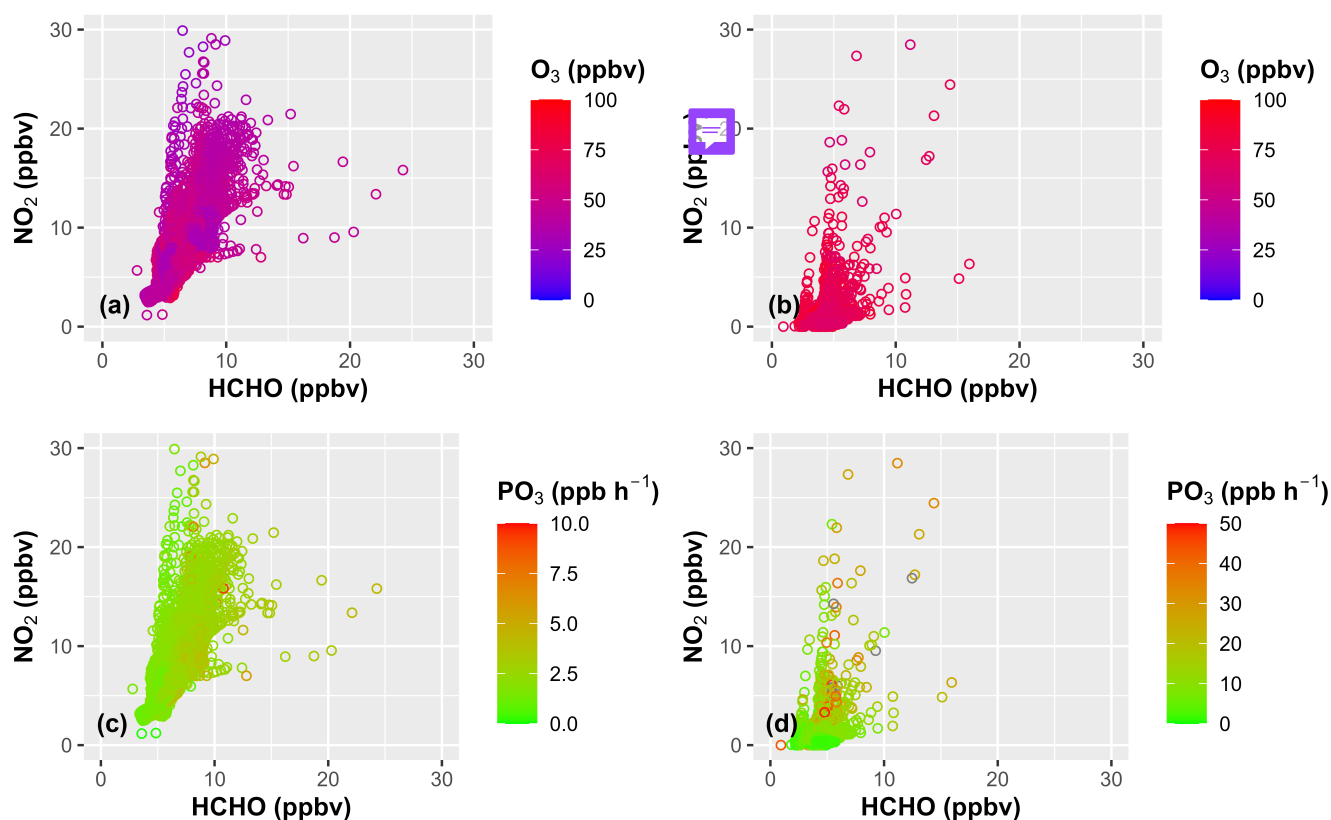

**Figure 9:**  $O_3$  (upper panel) and  $PO_3$  (lower panel) as a function of  $NO_2$  and  $HCHO$  for 09:00 CDT (a and c) and 15:00 CDT (b and d) in Houston from the LES domain. NOTE: we use different color scales for morning and afternoon periods for distinct understanding of ozone formation at different times.

480

Since the observed  $NO_x$ - $O_3$ -VOC chemistry in Fig. 8 shows some spatial heterogeneity of the  $O_3$  sensitivity regimes, we further examine the photochemical production of  $O_3$  in relation to different environments over Houston. Figure 10 shows the diurnal variability of  $O_3$  and  $NO_x$  and the  $O_3$  sensitivity regime indicators over four regions including Central Houston, La Porte, Brazoria-Galveston region (BGR) and the whole of Houston. According to Hossain et al. (2021), the contributions from



485 point sources in La Porte, Texas City near Galveston and downtown Houston contribute most to  $O_3$  formation as point sources  
alongside other mobile sources. The stations also represent different pollution characteristics to understand how unique  
emission sources affect the overall photochemical sensitivity to  $PO_3$ . For example, heavy power plants contribute the most  
 $NO_x$  in a VOC-limited regime and transportation in a  $NO_x$ -limited regime (Jin and Holloway, 2015). According to Nowlan et  
al. (2018), the highest  $NO_x$  emissions in Houston are from the metropolitan area from mobile sources. Among other HRVOCs,  
490 light olefins (including butene, ethane and propane) emissions dominate La Porte and Houston Ship Channel from  
petrochemical plants (Murphy and Allen, 2005). We show that  $NO_x$  levels are highest ( $NO_2 = 26$  ppbv;  $NO = 6$  ppbv) during  
the early morning over La Porte, followed by Central Houston ( $NO_2 = 22$  ppbv;  $NO = 6$  ppbv) and lowest at the Brazoria-  
Galveston region. The high level of  $NO_x$  over La Porte is mainly due to emissions from petrochemical plants and marine  
vessels at the HSC (Kim et al., 2011) and other mobile sources. On the other hand,  $NO_x$  emissions over Central Houston are  
495 from mobile sources (Nowlan et al., 2018; Kim et al., 2011), while the  $NO_x$  levels from BGR can be attributed to petroleum  
refining sources around Texas City (Souri et al., 2018). Notably,  $NO_x$  levels are generally low from the late morning hours  
into the afternoon and underline the diurnal variability of  $NO_x$  emission sources as well as the fast photodissociation of  $NO_x$ .  
Although the NEI anthropogenic emissions inventory reasonably captures these diurnal patterns, improvements are further  
needed given its overestimation of  $NO_x$  in Houston.

500 The diurnal variation of  $L_N/Q$  and FNR indicates that  $O_3$  formation is mainly a VOC-limited regime in the early morning over  
the Central Houston, La Porte and Whole Houston (domain average), and then transitions into a  $NO_x$ -limited regime later in  
the day (Fig. 10). During the morning hours, the lower  $O_3$  mixing ratio in Central Houston and La Porte is mainly associated  
with a VOC-limited regime due to higher  $NO_x$  levels; however, they increase gradually towards noontime as  $NO_x$  decreases  
with increasing VOCs. This is consistent with previous studies that have shown that  $O_3$  production is mainly suppressed by  
505 high  $NO_x$  concentrations in a VOC-limited regime (Li et al., 2011). On average,  $O_3$  formation is mainly  $NO_x$ -limited in the  
afternoon (between 11:30 and 16:00 CDT) across all the regions, and the high  $O_3$  (Fig. 10) is dependent on the daytime  
abundance of  $RO_2$  and  $HO_2$  radicals through the photolysis of  $O_3$ , HCHO and other secondary VOCs (Ma et al., 2022). In the  
Brazoria-Galveston region, the high  $O_3$  in the early morning hours is associated with  $O_3$  production being mainly  $NO_x$ -limited  
between 6:30 and 7:30 CDT ( $L_N/Q < 0.5$ ) before transitioning to a VOC-limited regime in the remaining hours of the morning  
510 (8:00 and 11:30 CDT). During this  $NO_x$ -limited period, high sources of  $NO_2$  rapidly increases  $O_3$  formation (Duncan et al.,  
2010; Schroeder et al., 2017). In addition, we show how  $O_3$  formation regime may vary spatially with height in the  
Supplementary Information (Fig. S9). We find that the production of  $O_3$  is under a VOC-limited regime at the surface in the  
morning and transitions into a  $NO_x$ -limited regime in the upper atmosphere ( $> 200$  m AGL) due to the rapid photochemical  
consumption nature of  $NO_x$  near the surface.

515



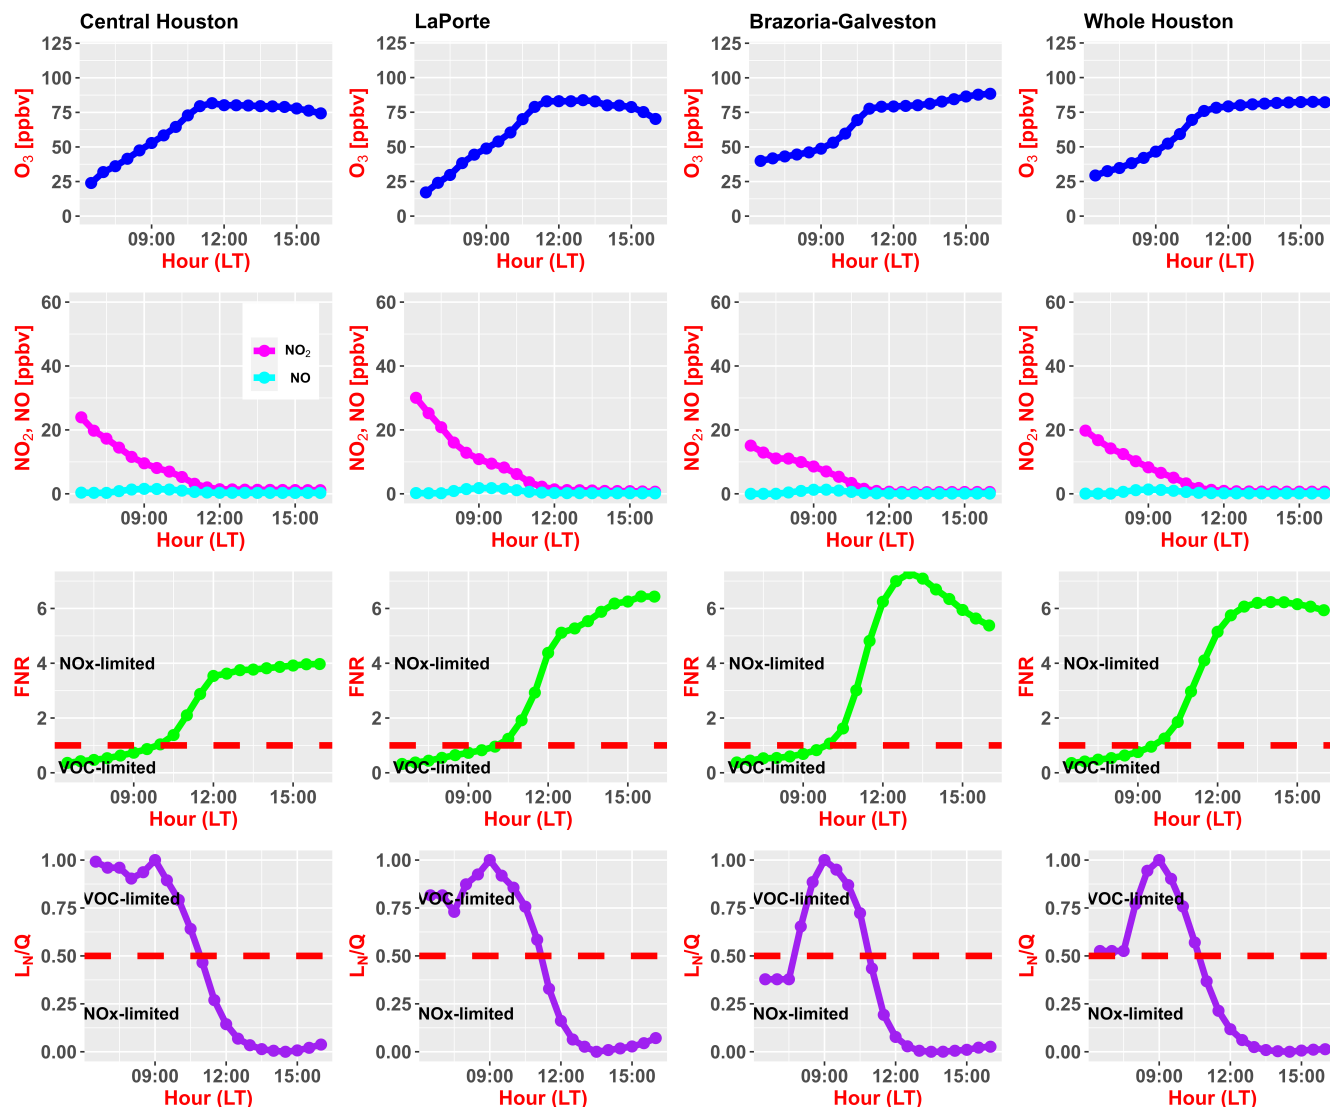

Figure 10: Diurnal variations of O<sub>3</sub> (first row), NO and NO<sub>2</sub> (second row), FNR (third row) and L<sub>w</sub>/Q (fourth row) in the near-surface layer averaged over Central Houston (first column), La Porte (second column), Brazoria-Galveston (third column) and the whole LES domain (fourth column). Results are from the LES domain (D04).

### 520 3.4 OH reactivity

We further quantify the total OH reactivity ( $K_{OH}$ ) to characterize the roles of VOCs in the formation of O<sub>3</sub>.  $K_{OH}$  is defined as the sum of concentrations of OH reactants multiplied by their reaction rate coefficients (Yang et al., 2016; Fuchs et al., 2017; Ma et al., 2022), as shown in Eq. (4)

$$K_{OH} = \sum_i^n K_{VOC_i} \times [VOC_i] \quad (4)$$



525 where  $[VOC_i]$  is the VOC concentrations and  $K_{VOC_i}$  is the corresponding reaction rate coefficients. In this study,  $K_{OH}$  is calculated from 29 major modeled VOC species which are grouped into three groups, including non-methane VOCs (NMVOCs), OVOCs and biogenic VOCs (BVOCs). The NMVOCs consist of alkanes (ethane, propane and lumped alkanes with  $C > 3$ ), alkenes (ethene, propene/propylene, lumped alkenes with  $C > 3$ ), alkynes (acetylene), aromatics (benzene, toluene, xylene) and glyoxal, while the BVOCs include isoprene and monoterpenes (limonene,  $\alpha$ -pinene,  $\beta$ -pinene,  $\beta$ -caryophyllene and other sesquiterpenes). The OVOCs species are mainly secondary VOC species and include ketones (methyl vinyl ketone, methyl ethyl ketone, acetone), aldehydes (formaldehyde, acetaldehyde, methacrolein, benzaldehyde, glycolaldehyde, lumped aldehyde), acids (formic acid, acetic acid), and alcohols (methanol, ethanol and phenol). Table 1 provides a summary of the total OH,  $O_3$  and  $NO_3$  reactivity with individual VOC species. The OH reactivity analysis shows isoprene is the highest contributor to total  $K_{OH}$  at noon (12:00 CDT) at  $9.86 \text{ s}^{-1}$  (35.76 %), followed by CO (12.98 %), HCHO (12.21 %), Bigalk  
530 (lumped alkanes; 6.29 %), and  $NO_2$  (4.46 %). The contribution of the daytime reactivity of isoprene to the total  $K_{OH}$  is substantial and very high when compared to other urban studies by Fuchs et al. (2017, 20 %) and Ma et al. (2022, 5 %). The contribution of HCHO (12.21 %) and acetaldehyde (4.88 %) as the most dominant OVOC species in reactivity with OH is consistent with the established literature from other locations (Whalley et al., 2016; Ma et al., 2022). Also, the high value of HCHO reactivity is related to the high values from the oxidation of isoprene, as HCHO in the Houston-Brazoria region is  
540 predominantly from VOC oxidation (Parrish et al., 2012; Zhou et al., 2014). For most species, the modeled  $K_{OH}$  reduces at 15:00 CDT compared to the noontime, while isoprene was higher at 15:00 CDT ( $9.98 \text{ s}^{-1}$ ; 46.61 %). In addition, we consider the modeled reactivity of  $O_3$  and  $NO_3$  with VOCs and show that the total  $O_3$  reactivity is dominated by the BVOCs. For example, the ozonolysis of  $\beta$ -caryophyllene increases from  $0.39 \text{ s}^{-1}$  at noon to  $0.84 \text{ s}^{-1}$  (27.07 %) in the late afternoon, due to the increased concentration of  $O_3$  at 15:00 CDT.

545 The overall breakdown of the VOC groups and their OH reactivity over the focused regions averaged from 6:30 to 16:00 CDT is summarized in Fig. 11. The daytime total VOC concentration is dominated by OVOCs (73 %), while BVOCs contribute the least ( $\sim 3$  %). In comparison to other regions, the maximum VOC concentration is observed in La Porte. On the other hand, the total  $K_{OH}$  is dominated by BVOCs (58 %) in the Central Houston region. From individual VOC species, NMVOCs species are mostly dominant with alkanes contributing to about 50–55 % of the total mixing ratio but are less reactive with OH radicals, while alkenes are more reactive with OH radicals and contribute 60–65 % of the total  $K_{OH}$  from NMVOCs across all zones. For BVOCs, isoprene is highly dominant with monoterpenes contributing less than 2 % in the total BVOC mixing ratio and reactivity with OH and mixing ratio. Aldehydes are the most reactive OVOCs (70–73 %), and alcohols dominate the total OVOC concentration ( $\sim 50$  %).

555 Figure 12 shows the mixing ratio and OH reactivity of individually modeled compounds as a stacked area plot over the whole Houston region. In the daytime, isoprene as the main biogenic species accounted for more than half of the total reactivity, while VOCs from anthropogenic activities and in oxygenated forms including alkanes, alkenes, aldehydes, alcohols and aromatics account for the other 50 % of the total OH reactivity. For NMVOCs and OVOCs, the total OH reactivity peaks at about 11:00 (CDT), while the OH reactivity of isoprene increases continuously during the day and peaks at 16:00 CDT. For



the mixing ratio, the NMVOCs peak in the early morning hours and gradually reduce towards late afternoon. Similar stacked area plots for Central Houston, La Porte and the BGR are provided in the Supplementary Materials (Fig. S10-S12). The results are consistent with the diurnal patterns observed over the whole Houston area, but a higher magnitude for total OH reactivity of NMVOCs and OVOCs is observed in La Porte, while isoprene contributes the highest to the total  $K_{OH}$  in Central Houston. The analysis of OH reactivity with VOC is important to estimate the potential of  $O_3$  formation from VOC oxidation. The oxidation of VOC by OH produces  $RO_2$  and  $HO_2$  radicals, which is identified as the major contributor to  $O_3$  formation in Houston (Zhou et al., 2014). While we show that isoprene contributes the highest to the total  $K_{OH}$  due to its high reactivity with OH, it is unknown how much this affects  $O_3$  formation. A recent study from Li et al. (2023) shows that isoprene reactivity did not increase during high  $O_3$  events during the NASA TRACER-AQ campaign, and shows similar OH reactivity on clean  $O_3$  days. OVOCs, similarly, show a high contribution to the total OH reactivity, particularly from HCHO and acetaldehyde, however, they are considered the most important VOC species oxidized by OH that increases  $O_3$  production (Zhou et al., 2014; Li et al., 2023). According to previous studies in Houston, HCHO represents the highest contributor to  $HO_2$  production (Parrish et al., 2012; Ren et al., 2013; Wong et al., 2013). From the Supplementary Material (Table S2), we also show the photolysis of HCHO, methyl glyoxal and glyoxal dominates the production of  $HO_x$  radicals over the whole Houston region. HCHO loss rate through photolysis peaks (with a maximum of  $0.14 \text{ pptv s}^{-1}$ ) at 12:00 CDT, similar to other loss rates across cities in Europe at  $0.28 \text{ pptv s}^{-1}$  (Nussbaumer et al., 2021). Industrial emissions are identified as the main primary source of HCHO in the Houston area (Johansson et al., 2014) with an average emission over the Houston region estimated at  $8631.02 \text{ mol km}^{-2} \text{ hr}^{-1}$  over the simulation period based on the NEI inventory. In contrast, a comprehensive chemical analysis of airborne and ground measurements of HCHO and emissions data concluded that HCHO is mainly from VOC oxidation in the Houston area (Parrish et al., 2012). As HCHO is one of the major oxidation products of isoprene by OH (Sprengnether et al., 2002), we conclude that high isoprene reactivity with OH enhances HCHO formation; the photolysis of HCHO forms  $HO_2$  which then increases the potential of  $O_3$  formation.

**Table 1: Reactivity of OH,  $O_3$ , and  $NO_3$  with key chemical species ( $s^{-1}$ ) averaged over the LES domain.**

| HRVOC Groups | Species                | OH reactivity |           | $O_3$ reactivity |           | $NO_3$ reactivity |           |
|--------------|------------------------|---------------|-----------|------------------|-----------|-------------------|-----------|
|              |                        | 12:00 Noon    | 15:00 CDT | 12:00 Noon       | 15:00 CDT | 12:00 Noon        | 15:00 CDT |
| NMVOCs       | Methane                | 0.29165       | 0.215078  | -*               | -         | -                 | -         |
|              | Ethane                 | 0.003451      | 0.002297  | -                | -         | -                 | -         |
|              | Propane                | 0.008885      | 0.004246  | -                | -         | -                 | -         |
|              | Bigalk ( $C_5H_{12}$ ) | 0.481717      | 0.630683  | -                | -         | -                 | -         |
|              | Ethene                 | 0.202339      | 0.095153  | 0.016405         | 0.014473  | -                 | -         |
|              | Propene                | 0.087006      | 0.047582  | 0.013262         | 0.015315  | 0.000033          | 0.000018  |
|              | Bigene ( $C_4H_8$ )    | 0.053194      | 0.042853  | -                | -         | 0.000394          | 0.000296  |
|              | Acetylene/Propylene    | 0.000193      | 0.000122  | -                | -         | -                 | -         |
|              | Benzene                | 0.001054      | 0.000575  | -                | -         | -                 | -         |
|              | Toluene                | 0.032341      | 0.011311  | -                | -         | -                 | -         |
| OVOCs        | Xylene                 | 0.025272      | 0.009502  | -                | -         | -                 | -         |
|              | Formaldehyde           | 0.934925      | 0.486296  | -                | -         | 0.000076          | 0.000034  |



|         |                                                                                          |          |          |          |            |          |            |
|---------|------------------------------------------------------------------------------------------|----------|----------|----------|------------|----------|------------|
|         | Acetaldehyde                                                                             | 0.374008 | 0.165279 | -        | -          | 0.000066 | 0.000026   |
|         | Methacrolein                                                                             | 0.127278 | 0.098421 | 0.002455 | 0.003566   | -        | -          |
|         | Benzaldehyde                                                                             | 0.002014 | 0.000886 | -        | -          | -        | -          |
|         | Glycolaldehyde                                                                           | 0.086827 | 0.076907 | -        | -          | -        | -          |
|         | Methyl ethyl ketone                                                                      | 0.026124 | 0.012443 | -        | -          | -        | -          |
|         | Methyl vinyl ketone                                                                      | 0.058917 | 0.0486   | 0.006997 | 0.009998   | -        | -          |
|         | Acetone                                                                                  | 0.020977 | 0.013498 | -        | -          | -        | -          |
|         | Acetic acid                                                                              | 0.011161 | 0.007475 | -        | -          | -        | -          |
|         | Formic acid                                                                              | 0.000758 | 0.000822 | -        | -          | -        | -          |
|         | Methanol                                                                                 | 0.254674 | 0.166337 | -        | -          | -        | -          |
|         | Phenol                                                                                   | 0.000364 | 0.000221 | -        | -          | -        | -          |
|         | Ethanol                                                                                  | 0.154746 | 0.065338 | -        | -          | -        | -          |
|         | 2-methyl-3-buten-2-<br>ol (MBO)                                                          | -        | -        | 0.000112 | 0.000197   | -        | -          |
|         | Glyoxal                                                                                  | 0.036711 | 0.023485 | -        | -          | -        | -          |
|         | Methylglyoxal                                                                            | 0.079254 | 0.044156 | -        | -          | 0.000019 | 0.000009   |
| BVOCs   | Isoprene                                                                                 | 2.738534 | 2.772071 | 0.271831 | 0.5330888  | 0.028773 | 0.02584423 |
|         | Limonene                                                                                 | 0.014099 | 0.013134 | 0.011429 | 0.01969507 | 0.001292 | 0.00109182 |
|         | $\alpha$ -pinene                                                                         | 0.007128 | 0.00584  | 0.007377 | 0.01115669 | 0.001146 | 0.00082383 |
|         | $\beta$ -pinene                                                                          | 0.006993 | 0.005868 | 0.001247 | 0.00197046 | 0.000317 | 0.00023717 |
|         | $\beta$ -caryophyllene and<br>other sesquiterpenes<br>(C <sub>15</sub> H <sub>24</sub> ) | 0.003188 | 0.003879 | 0.109703 | 0.23419166 | 0.00041  | 0.00044159 |
| Other   | CO                                                                                       | 0.994169 | 0.644294 | -        | -          | -        | -          |
| trace   | SO <sub>2</sub>                                                                          | 0.062321 | 0.026949 | -        | -          | -        | -          |
| species | O <sub>3</sub>                                                                           | 0.124186 | 0.094638 | -        | -          | -        | -          |
|         | NO <sub>2</sub>                                                                          | 0.341709 | 0.101966 | -        | -          | 0.044032 | 0.00924    |
|         | NO                                                                                       | -        | -        | -        | -          | 0.152788 | 0.041117   |

*Bigalk* represents lumped alkanes with  $C > 3$ , and *BIGENE* for lumped alkenes with  $C > 3$ .

*-\* also represents chemical reactivity not included in the model chemical mechanism)*

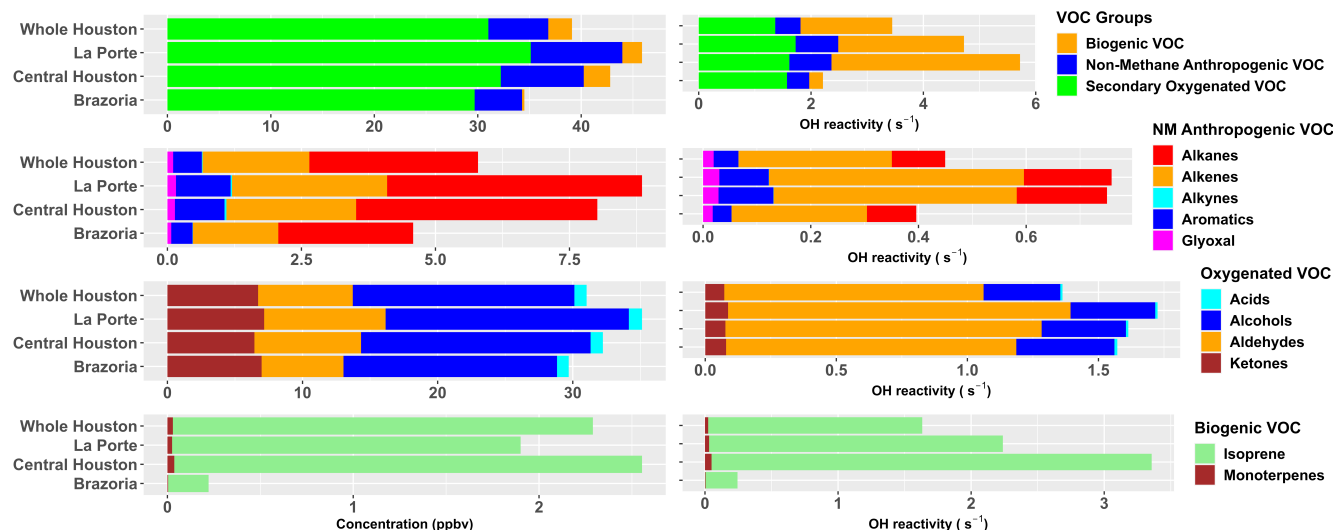

585 **Figure 11: The breakdown of grouped VOC mixing ratio (left panel) and OH reactivity (right panel) averaged over Central Houston, La Porte, Brazoria-Galveston and the whole LES domain.**

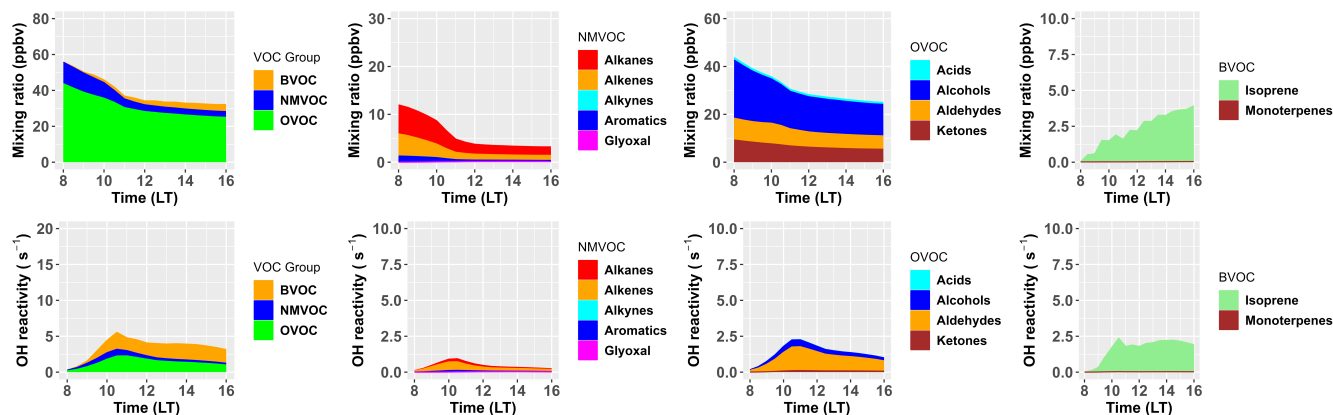

**Figure 12: Diurnal variations of VOC mixing ratio (upper panel) and OH reactivity (lower panel) averaged over the LES domain for (a, e) the all-VOC group, (b, f) NMVOC, (c, g) OVOC and (d, h) BVOC.**

590 **3.5 AOC analysis**

The oxidative capacity of the atmosphere is important to understand the abundance of RO<sub>x</sub> radicals including HO<sub>2</sub>, OH and RO<sub>2</sub> radicals, which drive the production, transformation and recycling of O<sub>3</sub> (Liu et al., 2022). AOC is calculated as the sum of oxidation rates of various pollutants by the major oxidants (OH, NO<sub>3</sub> and O<sub>3</sub>) (Xue et al., 2016; Chen et al., 2020; Liu et al., 2022). In this study, AOC is calculated based on the modeled VOCs and their rate coefficients, as shown in Eq. (5-7), and does not account for the reactivity of OH, NO<sub>3</sub> and O<sub>3</sub> with other VOC oxidation products that are not included in the gas phase mechanism used within our WRF-LES-Chem modeling. Thus, we acknowledge that possible discrepancies may exist between

595

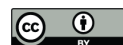

the calculated values of these reactivities and their actual measurements, as shown in previous studies (Mao et al., 2010; Ren et al., 2013).

$$\begin{aligned} \text{Total OH reactivity} = & \sum k_{OH+NMVOC_i}[NMVOC_i] + \\ & k_{OH+CH_4}[CH_4] + k_{OH+CO}[CO] + \\ & k_{OH+NO}[NO] + k_{OH+NO_2}[NO_2] + \\ & k_{OH+SO_2}[SO_2] + k_{OH+O_3}[O_3] + \dots \end{aligned} \quad (5)$$

$$\begin{aligned} \text{Total O}_3 \text{ reactivity} = & \sum k_{O_3+NMVOC_i}[NMVOC_i] + \\ & k_{O_3+CH_4}[CH_4] + k_{O_3+NO}[NO] + \\ & k_{O_3+NO_2}[NO_2] + \dots \end{aligned} \quad (6)$$

$$\begin{aligned} \text{Total NO}_3 \text{ reactivity} = & \sum k_{NO_3+NMVOC_i}[NMVOC_i] + \\ & k_{NO_3+CH_4}[CH_4] + k_{NO_3+NO}[NO] + \\ & k_{NO_3+NO_2}[NO_2] + k_{NO_3+SO_2}[SO_2] + \dots \end{aligned} \quad (7)$$

Figure 13 shows the time series of the model-calculated AOC over Houston. The estimated AOC daytime averages (08:00 – 16:00 CDT) is  $1.11 \times 10^8$  molecules  $\text{cm}^{-3} \text{s}^{-1}$ ,  $0.88 \times 10^8$  molecules  $\text{cm}^{-3} \text{s}^{-1}$ ,  $0.52 \times 10^8$  molecules  $\text{cm}^{-3} \text{s}^{-1}$  and  $0.69 \times 10^8$  molecules  $\text{cm}^{-3} \text{s}^{-1}$  respectively for Central Houston, La Porte, Brazoria-Galveston and Whole Houston. As shown in Fig. 13, the daily maximum AOC is observed in Central Houston and La Porte at  $1.5 \times 10^8$  molecules  $\text{cm}^{-3} \text{s}^{-1}$ , and much higher than those in the less polluted region in Brazoria-Galveston at  $0.8 \times 10^8$  molecules  $\text{cm}^{-3} \text{s}^{-1}$ . The daily maximum AOC is similar to other areas with high pollution from oil and gas in China ( $1.8 \times 10^8$  molecules  $\text{cm}^{-3} \text{s}^{-1}$ ; Chen et al., 2020) or other urban areas in Hong Kong ( $1.3 \times 10^8$  molecules  $\text{cm}^{-3} \text{s}^{-1}$ ; Xue et al., 2016) or Xiamen ( $1.3 \times 10^8$  molecules  $\text{cm}^{-3} \text{s}^{-1}$ ; Liu et al., 2022).

The differences in AOC across these regions may be attributed to relatively higher solar radiation or pollutant concentrations among different sites (Zhu et al., 2020; Liu et al., 2022). As expected, OH is the major daytime oxidant, accounting for more than 90 % of the total AOC. In the late afternoon, the contribution of O<sub>3</sub> to AOC increases up to 8-10 % in Central Houston and La Porte compared to the morning hours when they contribute less than 5 %. In addition, the higher contribution of O<sub>3</sub> to AOC is attributed to the high concentration of alkenes in the region (Xue et al., 2016), and alkene ozonolysis increases as the day progresses with the abundance of O<sub>3</sub>. AOC contributed by NO<sub>3</sub> is negligible as NO<sub>3</sub> can be quickly photodissociated during daytime thus having a low daytime concentration. Figure 14 elucidates the daytime variability of primary anthropogenic VOCs, OVOCs and trace species and their reactivity with OH, O<sub>3</sub> and NO<sub>3</sub>. In Brazoria-Galveston, the oxidation of alkanes, CO and methane (CH<sub>4</sub>) by OH increases slightly as the day progresses into late afternoon. The simulated OVOCs are the dominant contributor to OH reactivity and contribute 30-40 % of the total AOC across all regions. This is similarly evident over the whole of Houston. Further information from the Supplementary material shows that the total OH reactivity for OVOCs is much higher ( $1.36 \pm 0.59 \text{ s}^{-1}$ ) (mean  $\pm$  standard deviation) on average over the whole domain compared to other groups (see Table S3), while CO ( $0.72 \pm 0.29 \text{ s}^{-1}$ ), CH<sub>4</sub> ( $0.2 \pm 0.09 \text{ s}^{-1}$ ), alkanes ( $0.3 \pm 0.12 \text{ s}^{-1}$ ), alkenes ( $0.28 \pm 0.16 \text{ s}^{-1}$ ), aromatics ( $0.05 \pm 0.03 \text{ s}^{-1}$ ), and SO<sub>2</sub> ( $0.04 \pm 0.02 \text{ s}^{-1}$ ) also make up the averaged total OH reactivity, thus indicating the strong influence of anthropogenic emissions in Houston. The comparison across different zones shows that the oxidation of alkanes ( $0.39 \pm 0.19$





625  $s^{-1}$ ), aromatics ( $0.1 \pm 0.07 s^{-1}$ ), and CO ( $0.93 \pm 0.47 s^{-1}$ ) is highest over Central Houston, while the oxidation of alkenes ( $0.47 \pm 0.30 s^{-1}$ ) and SO<sub>2</sub> ( $0.06 \pm 0.04 s^{-1}$ ) is mostly dominant over La Porte. In contrast, the OH reactivity via CH<sub>4</sub> oxidation ( $0.27 \pm 0.13 s^{-1}$ ) is the highest over the BGR region. CH<sub>4</sub> represents an important factor that affects AOC, with OH + CH<sub>4</sub> being an important sink for OH in the atmosphere (Morgenstern et al., 2013). Overall, this underlines the role of spatial characteristics and unique local anthropogenic emission sources, which may contribute to the overall photochemical processes.

630

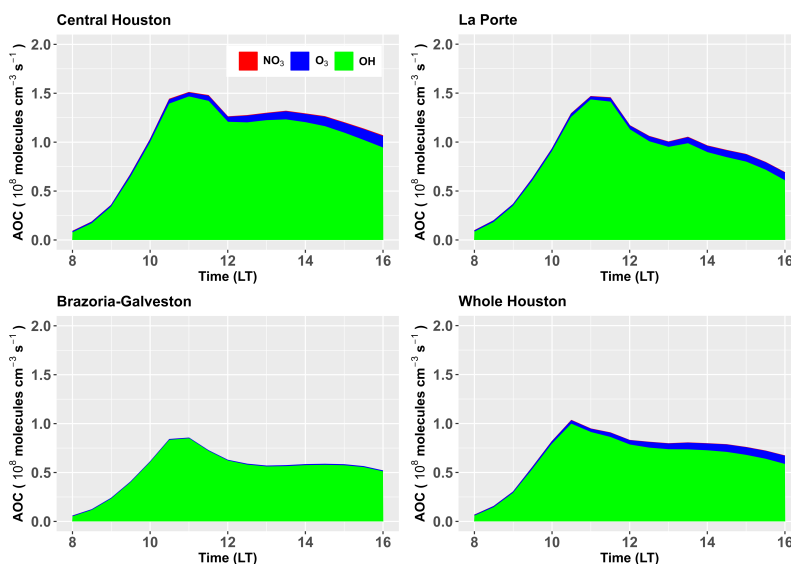

**Figure 13: Diurnal variations of AOC averaged over the Central Houston, La Porte, Brazoria-Galveston and the whole LES domain. Results are from the LES -domain.**

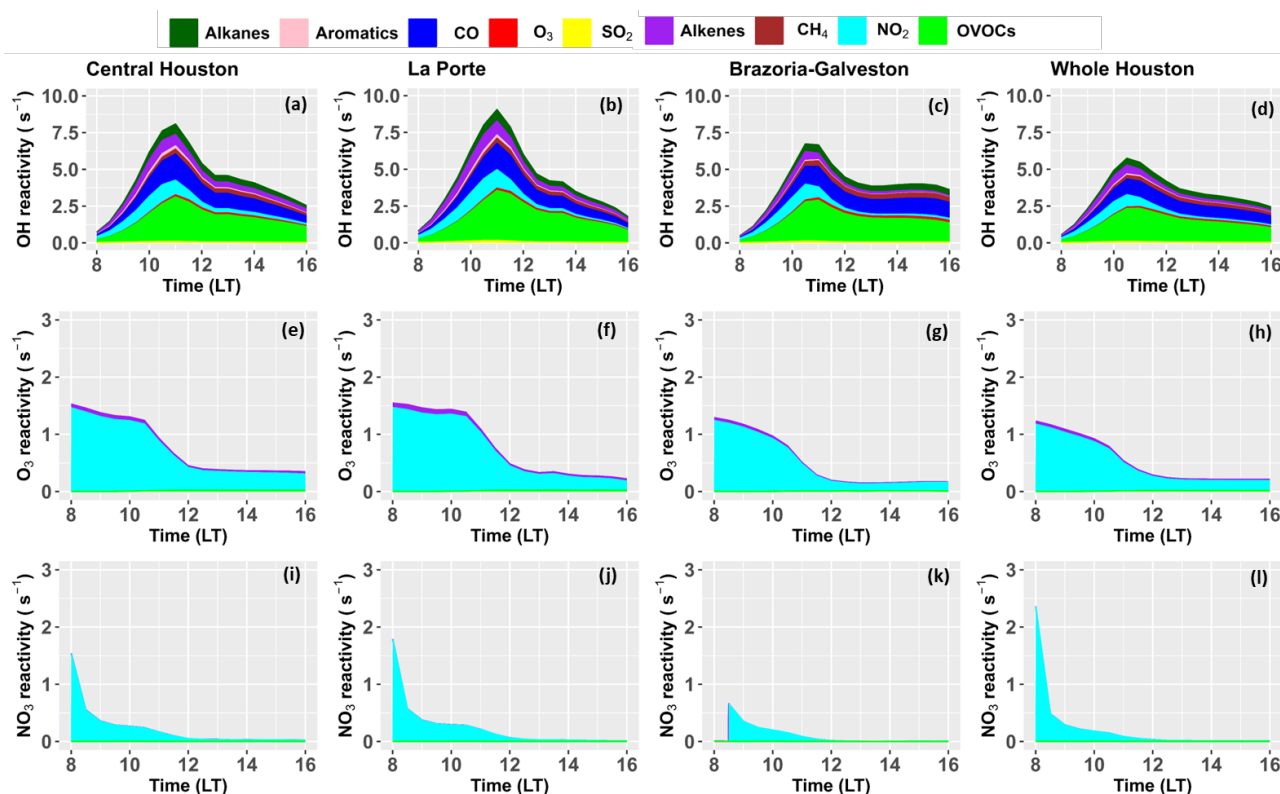

635 **Figure 14: Diurnal variations of OH reactivity (a-d), O<sub>3</sub> reactivity (e-h), and NO<sub>3</sub> reactivity (i-l) of selected major anthropogenic chemicals averaged over the Central Houston (first panel), La Porte (second panel), Brazoria-Galveston (third panel) and the whole LES domain (fourth panel). Results are from the LES domain.**

#### 4. Conclusion

In this study, we investigate the detailed atmospheric photochemistry during a high O<sub>3</sub> episode during TRACER-AQ 2021 in Houston. During this episode, observed surface O<sub>3</sub> significantly exceeded national standards by 20-50 ppb, particularly in the Central areas of Houston. We use a high-resolution WRF-LES-Chem model to simulate atmospheric O<sub>3</sub> as well as the detailed atmospheric photochemistry associated with these O<sub>3</sub> exceedances. By resolving turbulence and eddies at a scale relevant for pollutant chemistry, the LES simulation 300 m spatial resolution adequately captures the surface concentration of O<sub>3</sub>, NO<sub>x</sub>, and HCHO, and provides an improved representation of temperature, wind speed and water vapor compared to the mesoscale WRF-Chem simulations.

Two indicators for the O<sub>3</sub> sensitivity regime ( $L_N/Q$  and FNR) are compared and show that the photochemical properties of O<sub>3</sub> formation in Houston is largely a VOC-limited regime in the morning hours and transitions into a NO<sub>x</sub>-limited regime in the afternoon. Additionally, the transition threshold for radical loss-initiation ratio,  $L_N/Q$ , is used to define the FNR transition regime, which is observed at  $0.6 < \text{FNR} < 1.8$ . Some local regions, including Baytown, Texas City and Deer Park show no diurnal variability in O<sub>3</sub> formation sensitivity regimes, due to unique environmental and emission sources. On September 8,



2021, the rapid radical production and recycling of HO<sub>x</sub> radicals and their reactivity with increased VOC emissions and reduced NO<sub>2</sub> emissions under a NO<sub>x</sub>-limited regime accelerated fast and high O<sub>3</sub> production. The total radical production rate of HO<sub>x</sub> radicals increased PO<sub>3</sub> in the afternoon hours, reaching 50 ppb h<sup>-1</sup>, and higher than the previously recorded average in the DISCOVER-AQ campaign.

655 Increased HRVOC emission is the main cause of radical production. The HO<sub>2</sub> radical is mainly formed from the oxidation of HCHO and represents the highest source of HO<sub>2</sub> in Houston. The oxidation of other OVOCs including acetaldehyde also enhances the production of HO<sub>2</sub> radicals, which contributes to increased O<sub>3</sub> production. Our analysis linked the high oxidation of isoprene to enhance the production of HCHO, thus increasing the potential of O<sub>3</sub> formation when oxidized by OH. Our results further underline the role of BVOCs and how they may account for enhanced O<sub>3</sub> production, which is consistent with  
660 some recent studies (Leong et al., 2017; Ma et al., 2022). Similarly, RO<sub>2</sub> sources are alkenes oxidation, as compared to the oxidation of alkanes and aromatics.

Overall, the role of anthropogenic emissions cannot be underestimated. Primary emissions of CO and non-methane hydrocarbons (alkenes and other alkanes) affect the overall AOC levels, though the contribution of each compound to AOC varies with location and time. OVOCs also contribute about 30-40 % to the total AOC. Our study thus concludes the important  
665 role of anthropogenic emissions in the production of RO<sub>2</sub> and HO<sub>2</sub> radicals, and how they may influence the enhancement or inhibition of O<sub>3</sub> formation, depending on the NO<sub>x</sub>-O<sub>3</sub>-VOC sensitivity regimes. This suggests the importance of further reductions in highly reactive anthropogenic VOCs to achieve further reductions in O<sub>3</sub> levels.

### Code and data availability

670 The source code of WRF-Chem is publicly available on GitHub at <https://github.com/wrf-model/WRF>. Observational data from TCEQ and Pandora can be downloaded from the TAMIS web interface (<https://www17.tceq.texas.gov/tamis/index.cfm>; last access: 30 June 2023) and the Pandonia Global Network (<https://www.pandonia-global-network.org/>; last access: 3 July 2023) respectively. The TRACER-AQ data is archived on the NASA webpage (<https://www-air.larc.nasa.gov/cgi-bin/ArcView/traceraq.2021>). The Lidar data from the TRACER-AQ campaign is also available on the NASA Tropospheric  
675 Ozone Lidar Network (<https://tolnet.larc.nasa.gov>).

### Authors contributions

AF performed the simulations, carried out the analyses and wrote the manuscript. YL conceived and supervised the study and revised the paper. JD provided guidance in modeling setup and contributed to the editing of the paper. RS, SU, PW, JS, GG, JF, ME and TG provided measurement datasets and contributed to the editing of the paper.



## 680 **Competing interests**

The authors have declared no competing interests.

## **Disclaimer**

No Disclaimer.

## **Acknowledgements**

685 This research is funded by Baylor University. We acknowledge the contributions of the individuals and research groups who have collected and publicly shared their data from the TRACER-AQ 2021 campaign. We also acknowledge all the valuable suggestions from the scientists at NCAR and NOAA, including Dr. Mary Barth, Dr. Ned Patton, and Dr. Siyuan Wang. The San Jacinto field measurements and data analysis were funded by the Texas Commission on Environmental Quality (TCEQ, 582-21-22179-015 and 582-22-31913-020). The content, findings, opinions, and conclusions are the work of the authors and  
690 do not necessarily represent the findings, opinions, or conclusions of the TCEQ.

## **References**

- Baek, K., Kim, J. H., Herman, J. R., Haffner, D. P., and Kim, J.: Validation of Brewer and Pandora measurements using OMI total ozone, *Atmos. Environ.*, 160, 165–175, <https://doi.org/10.1016/j.atmosenv.2017.03.034>, 2017.
- Banta, R. M., Senff, C. J., Alvarez, R. J., Langford, A. O., Parrish, D. D., Trainer, M. K., Darby, L. S., Michael Hardesty, R.,  
695 Lambeth, B., Andrew Neuman, J., Angevine, W. M., Nielsen-Gammon, J., Sandberg, S. P., and White, A. B.: Dependence of daily peak O<sub>3</sub> concentrations near Houston, Texas on environmental factors: Wind speed, temperature, and boundary-layer depth, *Atmos. Environ.*, 45, 162–173, <https://doi.org/10.1016/j.atmosenv.2010.09.030>, 2011.
- Berlin, S. R., Langford, A. O., Estes, M., Dong, M., and Parrish, D. D.: Magnitude, Decadal Changes, and Impact of Regional Background Ozone Transported into the Greater Houston, Texas, Area, *Environ. Sci. Technol.*, 47, 13985–13992,  
700 <https://doi.org/10.1021/es4037644>, 2013.
- Blanchard, C. L., Tanenbaum, S., and Lawson, D. R.: Differences between Weekday and Weekend Air Pollutant Levels in Atlanta; Baltimore; Chicago; Dallas–Fort Worth; Denver; Houston; New York; Phoenix; Washington, DC; and Surrounding Areas, *J. Air Waste Manag. Assoc.*, 58, 1598–1615, <https://doi.org/10.3155/1047-3289.58.12.1598>, 2008.
- Botlaguduru, V. S. V. and Kommalapati, R. R.: Meteorological detrending of long-term (2003-2017) ozone and precursor  
705 concentrations at three sites in the Houston Ship Channel Region, *J. Air Waste Manag. Assoc.*, 70, 93–107, <https://doi.org/10.1080/10962247.2019.1694088>, 2020.



- Botlaguduru, V. S. V., Kommalapati, R. R., and Huque, Z.: Long-term meteorologically independent trend analysis of ozone air quality at an urban site in the greater Houston area, *J. Air Waste Manag. Assoc.*, 68, 1051–1064, <https://doi.org/10.1080/10962247.2018.1466740>, 2018.
- 710 Brown, S. S., Dubé, W. P., Peischl, J., Ryerson, T. B., Atlas, E., Warneke, C., de Gouw, J. A., te Lintel Hekkert, S., Brock, C. A., Flocke, F., Trainer, M., Parrish, D. D., Feshenfeld, F. C., and Ravishankara, A. R.: Budgets for nocturnal VOC oxidation by nitrate radicals aloft during the 2006 Texas Air Quality Study, *J. Geophys. Res. Atmospheres*, 116, <https://doi.org/10.1029/2011JD016544>, 2011.
- Chen, D., Wang, Y., McElroy, M. B., He, K., Yantosca, R. M., and Le Sager, P.: Regional CO pollution and export in China  
715 simulated by the high-resolution nested-grid GEOS-Chem model, *Atmospheric Chem. Phys.*, 9, 3825–3839, <https://doi.org/10.5194/acp-9-3825-2009>, 2009.
- Chen, F. and Dudhia, J.: Coupling an Advanced Land Surface–Hydrology Model with the Penn State–NCAR MM5 Modeling System. Part I: Model Implementation and Sensitivity, *Mon. Weather Rev.*, 129, 569–585, [https://doi.org/10.1175/1520-0493\(2001\)129<0569:CAALSH>2.0.CO;2](https://doi.org/10.1175/1520-0493(2001)129<0569:CAALSH>2.0.CO;2), 2001.
- 720 Chen, T., Xue, L., Zheng, P., Zhang, Y., Liu, Y., Sun, J., Han, G., Li, H., Zhang, X., Li, Y., Li, H., Dong, C., Xu, F., Zhang, Q., and Wang, W.: Volatile organic compounds and ozone air pollution in an oil production region in northern China, *Atmospheric Chem. Phys.*, 20, 7069–7086, <https://doi.org/10.5194/acp-20-7069-2020>, 2020.
- Chen, X., Wang, H., Liu, Y., Su, R., Wang, H., Lou, S., and Lu, K.: Spatial characteristics of the nighttime oxidation capacity in the Yangtze River Delta, China, *Atmos. Environ.*, 208, 150–157, <https://doi.org/10.1016/j.atmosenv.2019.04.012>, 2019.
- 725 Chen, Y., Wang, M., Yao, Y., Zeng, C., Zhang, W., Yan, H., Gao, P., Fan, L., and Ye, D.: Research on the ozone formation sensitivity indicator of four urban agglomerations of China using Ozone Monitoring Instrument (OMI) satellite data and ground-based measurements, *Sci. Total Environ.*, 869, 161679, <https://doi.org/10.1016/j.scitotenv.2023.161679>, 2023.
- Choi, Y. and Souri, A. H.: Chemical condition and surface ozone in large cities of Texas during the last decade: Observational evidence from OMI, CAMS, and model analysis, *Remote Sens. Environ.*, 168, 90–101,  
730 <https://doi.org/10.1016/j.rse.2015.06.026>, 2015.
- Cuchiara, G. C., Li, X., Carvalho, J., and Rappenglück, B.: Intercomparison of planetary boundary layer parameterization and its impacts on surface ozone concentration in the WRF/Chem model for a case study in Houston/Texas, *Atmos. Environ.*, 96, 175–185, <https://doi.org/10.1016/j.atmosenv.2014.07.013>, 2014.
- Czader, B. H. and Rappenglück, B.: Modeling of 1,3-butadiene in urban and industrial areas, *Atmos. Environ.*, 102, 30–42,  
735 <https://doi.org/10.1016/j.atmosenv.2014.11.039>, 2015.
- Darby, L. S.: Cluster analysis of surface winds in Houston, Texas, and the impact of wind patterns on ozone, *J. Appl. Meteorol.*, 44, 1788–1806, <https://doi.org/10.1175/JAM2320.1>, 2005.
- Deardorff, J. W.: A numerical study of three-dimensional turbulent channel flow at large Reynolds numbers, *J. Fluid Mech.*, 41, 453–480, <https://doi.org/10.1017/S0022112070000691>, 1970.



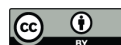

- 740 De Foy, B., Brune, W. H., and Schauer, J. J.: Changes in ozone photochemical regime in Fresno, California from 1994 to 2018 deduced from changes in the weekend effect, *Environ. Pollut.*, 263, 114380, <https://doi.org/10.1016/j.envpol.2020.114380>, 2020.
- Dowell, D. C., Alexander, C. R., James, E. P., Weygandt, S. S., Benjamin, S. G., Manikin, G. S., Blake, B. T., Brown, J. M., Olson, J. B., Hu, M., Smirnova, T. G., Ladwig, T., Kenyon, J. S., Ahmadov, R., Turner, D. D., Duda, J. D., and Alcott, T. I.:
- 745 The High-Resolution Rapid Refresh (HRRR): An Hourly Updating Convection-Allowing Forecast Model. Part I: Motivation and System Description, *Weather Forecast.*, 37, 1371–1395, <https://doi.org/10.1175/WAF-D-21-0151.1>, 2022.
- Du, X., Tang, W., Zhang, Z., Li, Y., Yu, Y., Xiao, Z., and Meng, F.: Sensitivity modeling of ozone and its precursors over the Chengdu metropolitan area, *Atmos. Environ.*, 277, 119071, <https://doi.org/10.1016/j.atmosenv.2022.119071>, 2022.
- Duncan, B. N., Yoshida, Y., Olson, J. R., Sillman, S., Martin, R. V., Lamsal, L., Hu, Y., Pickering, K. E., Retscher, C., Allen,
- 750 D. J., and Crawford, J. H.: Application of OMI observations to a space-based indicator of NO<sub>x</sub> and VOC controls on surface ozone formation, *Atmos. Environ.*, 44, 2213–2223, <https://doi.org/10.1016/j.atmosenv.2010.03.010>, 2010.
- Emmons, L. K., Schwantes, R. H., Orlando, J. J., Tyndall, G., Kinnison, D., Lamarque, J.-F., Marsh, D., Mills, M. J., Tilmes, S., Bardeen, C., Buchholz, R. R., Conley, A., Gettelman, A., Garcia, R., Simpson, I., Blake, D. R., Meinardi, S., and Pétron, G.: The Chemistry Mechanism in the Community Earth System Model Version 2 (CESM2), *J. Adv. Model. Earth Syst.*, 12, e2019MS001882, <https://doi.org/10.1029/2019MS001882>, 2020.
- 755 Fast, J. D., Gustafson Jr., W. I., Easter, R. C., Zaveri, R. A., Barnard, J. C., Chapman, E. G., Grell, G. A., and Peckham, S. E.: Evolution of ozone, particulates, and aerosol direct radiative forcing in the vicinity of Houston using a fully coupled meteorology-chemistry-aerosol model, *J. Geophys. Res. Atmospheres*, 111, <https://doi.org/10.1029/2005JD006721>, 2006.
- Faulstich, S. D., Schissler, A. G., Strickland, M. J., and Holmes, H. A.: Statistical Comparison and Assessment of Four Fire
- 760 Emissions Inventories for 2013 and a Large Wildfire in the Western United States, *Fire*, 5, 27, <https://doi.org/10.3390/fire5010027>, 2022.
- Fuchs, H., Tan, Z., Lu, K., Bohn, B., Broch, S., Brown, S. S., Dong, H., Gomm, S., Häsel, R., He, L., Hofzumahaus, A., Holland, F., Li, X., Liu, Y., Lu, S., Min, K.-E., Rohrer, F., Shao, M., Wang, B., Wang, M., Wu, Y., Zeng, L., Zhang, Y., Wahner, A., and Zhang, Y.: OH reactivity at a rural site (Wangdu) in the North China Plain: contributions from OH reactants
- 765 and experimental OH budget, *Atmospheric Chem. Phys.*, 17, 645–661, <https://doi.org/10.5194/acp-17-645-2017>, 2017.
- Gettelman, A., Hannay, C., Bacmeister, J. T., Neale, R. B., Pendergrass, A. G., Danabasoglu, G., Lamarque, J.-F., Fasullo, J. T., Bailey, D. A., Lawrence, D. M., and Mills, M. J.: High Climate Sensitivity in the Community Earth System Model Version 2 (CESM2), *Geophys. Res. Lett.*, 46, 8329–8337, <https://doi.org/10.1029/2019GL083978>, 2019.
- Geyer, A., Alicke, B., Ackermann, R., Martinez, M., Harder, H., Brune, W., di Carlo, P., Williams, E., Jobson, T., Hall, S.,
- 770 Shetter, R., and Stutz, J.: Direct observations of daytime NO<sub>3</sub>: Implications for urban boundary layer chemistry, *J. Geophys. Res. Atmospheres*, 108, <https://doi.org/10.1029/2002JD002967>, 2003.



- Gholami, S., Ghader, S., Khaleghi-Zavareh, H., and Ghafarian, P.: Sensitivity of WRF-simulated 10 m wind over the Persian Gulf to different boundary conditions and PBL parameterization schemes, *Atmospheric Res.*, 247, 105147, <https://doi.org/10.1016/j.atmosres.2020.105147>, 2021.
- 775 Goldberg, D. L., Vinciguerra, T. P., Anderson, D. C., Hembeck, L., Canty, T. P., Ehrman, S. H., Martins, D. K., Stauffer, R. M., Thompson, A. M., Salawitch, R. J., and Dickerson, R. R.: CAMx ozone source attribution in the eastern United States using guidance from observations during DISCOVER-AQ Maryland, *Geophys. Res. Lett.*, 43, 2249–2258, <https://doi.org/10.1002/2015GL067332>, 2016.
- Goldberg, D. L., Harkey, M., de Foy, B., Judd, L., Johnson, J., Yarwood, G., and Holloway, T.: Evaluating NO<sub>x</sub> emissions and their effect on O<sub>3</sub> production in Texas using TROPOMI NO<sub>2</sub> and HCHO, *Atmospheric Chem. Phys.*, 22, 10875–10900, <https://doi.org/10.5194/acp-22-10875-2022>, 2022.
- 780 Grant, L. D., Heever, S. C. van den, Haddad, Z. S., Bukowski, J., Marinescu, P. J., Storer, R. L., Posselt, D. J., and Stephens, G. L.: A Linear Relationship between Vertical Velocity and Condensation Processes in Deep Convection, *J. Atmospheric Sci.*, 79, 449–466, <https://doi.org/10.1175/JAS-D-21-0035.1>, 2022.
- 785 Grell, G. A. and Dévényi, D.: A generalized approach to parameterizing convection combining ensemble and data assimilation techniques, *Geophys. Res. Lett.*, 29, 38-1-38–4, <https://doi.org/10.1029/2002GL015311>, 2002.
- Grell, G. A., Peckham, S. E., Schmitz, R., McKeen, S. A., Frost, G., Skamarock, W. C., and Eder, B.: Fully coupled “online” chemistry within the WRF model, *Atmos. Environ.*, 39, 6957–6975, <https://doi.org/10.1016/j.atmosenv.2005.04.027>, 2005.
- Gronoff, G., Robinson, J., Berkoff, T., Swap, R., Farris, B., Schroeder, J., Halliday, H. S., Knepp, T., Spinei, E., Carrion, W., Adcock, E. E., Johns, Z., Allen, D., and Pippin, M.: A method for quantifying near range point source induced O<sub>3</sub> titration events using Co-located Lidar and Pandora measurements, *Atmos. Environ.*, 204, 43–52, <https://doi.org/10.1016/j.atmosenv.2019.01.052>, 2019.
- 790 Guenther, A., Karl, T., Harley, P., Wiedinmyer, C., Palmer, P. I., and Geron, C.: Estimates of global terrestrial isoprene emissions using MEGAN (Model of Emissions of Gases and Aerosols from Nature), *Atmospheric Chem. Phys.*, 6, 3181–3210, <https://doi.org/10.5194/acp-6-3181-2006>, 2006.
- Herman, J., Cede, A., Spinei, E., Mount, G., Tzortziou, M., and Abuhassan, N.: NO<sub>2</sub> column amounts from ground-based Pandora and MFDOAS spectrometers using the direct-sun DOAS technique: Intercomparisons and application to OMI validation, *J. Geophys. Res. Atmospheres*, 114, <https://doi.org/10.1029/2009JD011848>, 2009.
- Herman, J., Spinei, E., Fried, A., Kim, J., Kim, J., Kim, W., Cede, A., Abuhassan, N., and Segal-Rozenhaimer, M.: NO<sub>2</sub> and HCHO measurements in Korea from 2012 to 2016 from Pandora spectrometer instruments compared with OMI retrievals and with aircraft measurements during the KORUS-AQ campaign, *Atmospheric Meas. Tech.*, 11, 4583–4603, <https://doi.org/10.5194/amt-11-4583-2018>, 2018.
- 800 Herrmann, M. and Gutheil, E.: Simulation of the Air Quality in Southern California, USA in July and October of the Year 2018, *Atmosphere*, 13, 548, <https://doi.org/10.3390/atmos13040548>, 2022.



- 805 Hong, S.-Y., Noh, Y., and Dudhia, J.: A New Vertical Diffusion Package with an Explicit Treatment of Entrainment Processes, *Mon. Weather Rev.*, 134, 2318–2341, <https://doi.org/10.1175/MWR3199.1>, 2006.
- Hossain, I., Du, H., and Kommalapati, R. R.: Anthropogenic Source Contributions to Ozone Formation in the Greater Houston Area, *J. Environ. Prot.*, 12, 249–264, <https://doi.org/10.4236/jep.2021.124016>, 2021.
- Iacono, M. J., Delamere, J. S., Mlawer, E. J., Shephard, M. W., Clough, S. A., and Collins, W. D.: Radiative forcing by long-  
810 lived greenhouse gases: Calculations with the AER radiative transfer models, *J. Geophys. Res. Atmospheres*, 113, <https://doi.org/10.1029/2008JD009944>, 2008.
- Jiménez, P. A., Dudhia, J., González-Rouco, J. F., Navarro, J., Montávez, J. P., and García-Bustamante, E.: A Revised Scheme for the WRF Surface Layer Formulation, *Mon. Weather Rev.*, 140, 898–918, <https://doi.org/10.1175/MWR-D-11-00056.1>, 2012.
- 815 Jiménez, P. A., Dudhia, J., Thompson, G., Lee, J. A., and Brummet, T.: Improving the cloud initialization in WRF-Solar with enhanced short-range forecasting functionality: The MAD-WRF model, *Sol. Energy*, 239, 221–233, <https://doi.org/10.1016/j.solener.2022.04.055>, 2022.
- Jin, X. and Holloway, T.: Spatial and temporal variability of ozone sensitivity over China observed from the Ozone Monitoring Instrument, *J. Geophys. Res. Atmospheres*, 120, 7229–7246, <https://doi.org/10.1002/2015JD023250>, 2015.
- 820 Johansson, J. K. E., Mellqvist, J., Samuelsson, J., Offerle, B., Moldanova, J., Rappenglück, B., Lefter, B., and Flynn, J.: Quantitative measurements and modeling of industrial formaldehyde emissions in the Greater Houston area during campaigns in 2009 and 2011, *J. Geophys. Res. Atmospheres*, 119, 4303–4322, <https://doi.org/10.1002/2013JD020159>, 2014.
- Kantha Rao, B. and Rakesh, V.: Evaluation of WRF-simulated multilevel soil moisture, 2-m air temperature, and 2-m relative humidity against in situ observations in India, *Pure Appl. Geophys.*, 176, 1807–1826, [825 2022-7](https://doi.org/10.1007/s00024-018-825), 2019.
- Kim, S.-W., McKeen, S. A., Frost, G. J., Lee, S.-H., Trainer, M., Richter, A., Angevine, W. M., Atlas, E., Bianco, L., Boersma, K. F., Brioude, J., Burrows, J. P., De Gouw, J., Fried, A., Gleason, J., Hilboll, A., Mellqvist, J., Peischl, J., Richter, D., Rivera, C., Ryerson, T., Te Lintel Hekkert, S., Walega, J., Warneke, C., Weibring, P., and Williams, E.: Evaluations of NO<sub>x</sub> and highly reactive VOC emission inventories in Texas and their implications for ozone plume simulations during the Texas Air Quality  
830 Study 2006, *Atmospheric Chem. Phys.*, 11, 11361–11386, <https://doi.org/10.5194/acp-11-11361-2011>, 2011.
- Kleinman, L. I.: The dependence of tropospheric ozone production rate on ozone precursors, *Atmos. Environ.*, 39, 575–586, <https://doi.org/10.1016/j.atmosenv.2004.08.047>, 2005.
- Kleinman, L. I., Daum, P. H., Lee, Y.-N., Nunnermacker, L. J., Springston, S. R., Weinstein-Lloyd, J., and Rudolph, J.: Sensitivity of ozone production rate to ozone precursors, *Geophys. Res. Lett.*, 28, 2903–2906,  
835 <https://doi.org/10.1029/2000GL012597>, 2001.
- Lebo, Z. J. and Morrison, H.: Effects of Horizontal and Vertical Grid Spacing on Mixing in Simulated Squall Lines and Implications for Convective Strength and Structure, *Mon. Weather Rev.*, 143, 4355–4375, <https://doi.org/10.1175/MWR-D-15-0154.1>, 2015.



- Leong, Y. J., Sanchez, N. P., Wallace, H. W., Karakurt Cevik, B., Hernandez, C. S., Han, Y., Flynn, J. H., Massoli, P.,  
840 Floerchinger, C., Fortner, E. C., Herndon, S., Bean, J. K., Hildebrandt Ruiz, L., Jeon, W., Choi, Y., Lefer, B., and Griffin, R.  
J.: Overview of surface measurements and spatial characterization of submicrometer particulate matter during the DISCOVER-  
AQ 2013 campaign in Houston, TX, *J. Air Waste Manag. Assoc.*, 67, 854–872,  
<https://doi.org/10.1080/10962247.2017.1296502>, 2017.
- Li, J., An, X., Cui, M., Sun, Z., Wang, C., and Li, Y.: Simulation study on regional atmospheric oxidation capacity and  
845 precursor sensitivity, *Atmos. Environ.*, 263, 118657, <https://doi.org/10.1016/j.atmosenv.2021.118657>, 2021.
- Li, L., Chen, C., Huang, C., Huang, H., Zhang, G., Wang, Y., Chen, M., Wang, H., Chen, Y., Streets, D. G., and Fu, J.: Ozone  
sensitivity analysis with the MM5-CMAQ modeling system for Shanghai, *J. Environ. Sci.*, 23, 1150–1157,  
[https://doi.org/10.1016/S1001-0742\(10\)60527-X](https://doi.org/10.1016/S1001-0742(10)60527-X), 2011.
- Li, W., Wang, Y., Flynn, J., Griffin, R. J., Guo, F., and Schnell, J. L.: Spatial Variation of Surface O<sub>3</sub> Responses to Drought  
850 Over the Contiguous United States During Summertime: Role of Precursor Emissions and Ozone Chemistry, *J. Geophys. Res.*  
*Atmospheres*, 127, e2021JD035607, <https://doi.org/10.1029/2021JD035607>, 2022.
- Li, W., Wang, Y., Liu, X., Soleimanian, E., Griggs, T., Flynn, J., and Walter, P.: Understanding offshore high-ozone events  
during TRACER-AQ 2021 in Houston: insights from WRF–CAMx photochemical modeling, *Atmospheric Chem. Phys.*, 23,  
13685–13699, <https://doi.org/10.5194/acp-23-13685-2023>, 2023.
- 855 Li, Y., Barth, M. C., Chen, G., Patton, E. G., Kim, S.-W., Wisthaler, A., Mikoviny, T., Fried, A., Clark, R., and Steiner, A. L.:  
Large-eddy simulation of biogenic VOC chemistry during the DISCOVER-AQ 2011 campaign, *J. Geophys. Res.*  
*Atmospheres*, 121, 8083–8105, <https://doi.org/10.1002/2016JD024942>, 2016.
- Li, Z., Xue, L., Yang, X., Zha, Q., Tham, Y. J., Yan, C., Louie, P. K. K., Luk, C. W. Y., Wang, T., and Wang, W.: Oxidizing  
capacity of the rural atmosphere in Hong Kong, Southern China, *Sci. Total Environ.*, 612, 1114–1122,  
860 <https://doi.org/10.1016/j.scitotenv.2017.08.310>, 2018.
- Liang, Z., Rao, J., Guo, D., and Lu, Q.: Simulation and projection of the sudden stratospheric warming events in different  
scenarios by CESM2-WACCM, *Clim. Dyn.*, 59, 3741–3761, <https://doi.org/10.1007/s00382-022-06293-2>, 2022.
- Liu, T., Mickley, L. J., Marlier, M. E., DeFries, R. S., Khan, M. F., Latif, M. T., and Karambelas, A.: Diagnosing spatial biases  
and uncertainties in global fire emissions inventories: Indonesia as regional case study, *Remote Sens. Environ.*, 237, 111557,  
865 <https://doi.org/10.1016/j.rse.2019.111557>, 2020.
- Liu, T., Hong, Y., Li, M., Xu, L., Chen, J., Bian, Y., Yang, C., Dan, Y., Zhang, Y., Xue, L., Zhao, M., Huang, Z., and Wang,  
H.: Atmospheric oxidation capacity and ozone pollution mechanism in a coastal city of southeastern China: analysis of a  
typical photochemical episode by an observation-based model, *Atmospheric Chem. Phys.*, 22, 2173–2190,  
<https://doi.org/10.5194/acp-22-2173-2022>, 2022.
- 870 Liu, X., Wang, Y., Wasti, S., Li, W., Soleimanian, E., Flynn, J., Griggs, T., Alvarez, S., Sullivan, J. T., Roots, M., Twigg, L.,  
Gronoff, G., Berkoff, T., Walter, P., Estes, M., Hair, J. W., Shingler, T., Scarino, A. J., Fenn, M., and Judd, L.: Evaluating



- WRF-GC v2.0 predictions of boundary layer height and vertical ozone profile during the 2021 TRACER-AQ campaign in Houston, Texas, *Geosci. Model Dev.*, 16, 5493–5514, <https://doi.org/10.5194/gmd-16-5493-2023>, 2023.
- Ma, X., Tan, Z., Lu, K., Yang, X., Chen, X., Wang, H., Chen, S., Fang, X., Li, S., Li, X., Liu, J., Liu, Y., Lou, S., Qiu, W.,  
875 Wang, H., Zeng, L., and Zhang, Y.: OH and HO<sub>2</sub> radical chemistry at a suburban site during the EXPLORE-YRD campaign in 2018, *Atmospheric Chem. Phys.*, 22, 7005–7028, <https://doi.org/10.5194/acp-22-7005-2022>, 2022.
- Mao, J., Ren, X., Chen, S., Brune, W. H., Chen, Z., Martinez, M., Harder, H., Lefer, B., Rappenglück, B., Flynn, J., and Leuchner, M.: Atmospheric oxidation capacity in the summer of Houston 2006: Comparison with summer measurements in other metropolitan studies, *Atmos. Environ.*, 44, 4107–4115, <https://doi.org/10.1016/j.atmosenv.2009.01.013>, 2010.
- 880 Marsha, A., Sain, S. R., Heaton, M. J., Monaghan, A. J., and Wilhelmi, O. V.: Influences of climatic and population changes on heat-related mortality in Houston, Texas, USA, *Clim. Change*, 146, 471–485, <https://doi.org/10.1007/s10584-016-1775-1>, 2018.
- Martins, D. K., Najjar, R. G., Tzortziou, M., Abuhassan, N., Thompson, A. M., and Kollonige, D. E.: Spatial and temporal variability of ground and satellite column measurements of NO<sub>2</sub> and O<sub>3</sub> over the Atlantic Ocean during the Deposition of  
885 Atmospheric Nitrogen to Coastal Ecosystems Experiment, *J. Geophys. Res. Atmospheres*, 121, 14,175-14,187, <https://doi.org/10.1002/2016JD024998>, 2016.
- Mazuca, G. M., Ren, X., Loughner, C. P., Estes, M., Crawford, J. H., Pickering, K. E., Weinheimer, A. J., and Dickerson, R. R.: Ozone production and its sensitivity to NO<sub>x</sub> and VOCs: results from the DISCOVER-AQ field experiment, Houston 2013, *Atmospheric Chem. Phys.*, 16, 14463–14474, <https://doi.org/10.5194/acp-16-14463-2016>, 2016.
- 890 Miao, Y., Li, J., Miao, S., Che, H., Wang, Y., Zhang, X., Zhu, R., and Liu, S.: Interaction Between Planetary Boundary Layer and PM<sub>2.5</sub> Pollution in Megacities in China: a Review, *Curr. Pollut. Rep.*, 5, 261–271, <https://doi.org/10.1007/s40726-019-00124-5>, 2019.
- Morgenstern, O., Zeng, G., Luke Abraham, N., Telford, P. J., Braesicke, P., Pyle, J. A., Hardiman, S. C., O’Connor, F. M., and Johnson, C. E.: Impacts of climate change, ozone recovery, and increasing methane on surface ozone and the tropospheric  
895 oxidizing capacity, *JGR Atmospheres*, 118, 1028–1041, <https://doi.org/10.1029/2012JD018382>, 2013.
- Morris, G. A., Hersey, S., Thompson, A. M., Pawson, S., Nielsen, J. E., Colarco, P. R., McMillan, W. W., Stohl, A., Turquety, S., Warner, J., Johnson, B. J., Kucsera, T. L., Larko, D. E., Oltmans, S. J., and Witte, J. C.: Alaskan and Canadian forest fires exacerbate ozone pollution over Houston, Texas, on 19 and 20 July 2004, *J. Geophys. Res. Atmospheres*, 111, <https://doi.org/10.1029/2006JD007090>, 2006.
- 900 Morrison, H., Thompson, G., and Tatarskii, V.: Impact of Cloud Microphysics on the Development of Trailing Stratiform Precipitation in a Simulated Squall Line: Comparison of One- and Two-Moment Schemes, *Mon. Weather Rev.*, 137, 991–1007, <https://doi.org/10.1175/2008MWR2556.1>, 2009.
- Murphy, C. F. and Allen, D. T.: Hydrocarbon emissions from industrial release events in the Houston-Galveston area and their impact on ozone formation, *Atmos. Environ.*, 39, 3785–3798, <https://doi.org/10.1016/j.atmosenv.2005.02.051>, 2005.





- 905 Nam, J., Kimura, Y., Vizuete, W., Murphy, C., and Allen, D. T.: Modeling the impacts of emission events on ozone formation in Houston, Texas, *Atmos. Environ.*, 40, 5329–5341, <https://doi.org/10.1016/j.atmosenv.2006.05.002>, 2006.  
NCEP: NCEP FNL Operational Model Global Tropospheric Analyses, continuing from July 1999. Research Data Archive at the National Center for Atmospheric Research, Computational and Information Systems Laboratory., 2000.
- Nowlan, C. R., Liu, X., Janz, S. J., Kowalewski, M. G., Chance, K., Follette-Cook, M. B., Fried, A., González Abad, G.,  
910 Herman, J. R., Judd, L. M., Kwon, H.-A., Loughner, C. P., Pickering, K. E., Richter, D., Spinei, E., Walega, J., Weibring, P., and Weinheimer, A. J.: Nitrogen dioxide and formaldehyde measurements from the GEOstationary Coastal and Air Pollution Events (GEO-CAPE) Airborne Simulator over Houston, Texas, *Atmospheric Meas. Tech.*, 11, 5941–5964, <https://doi.org/10.5194/amt-11-5941-2018>, 2018.
- Nussbaumer, C. M., Crowley, J. N., Schuladen, J., Williams, J., Hafermann, S., Reiffs, A., Axinte, R., Harder, H., Ernest, C.,  
915 Novelli, A., Sala, K., Martinez, M., Mallik, C., Tomsche, L., Plass-Dülmer, C., Bohn, B., Lelieveld, J., and Fischer, H.: Measurement report: Photochemical production and loss rates of formaldehyde and ozone across Europe, *Atmospheric Chemistry and Physics*, 21, 18413–18432, <https://doi.org/10.5194/acp-21-18413-2021>, 2021.
- Ochsner, T. E., Cosh, M. H., Cuenca, R. H., Dorigo, W. A., Draper, C. S., Hagimoto, Y., Kerr, Y. H., Larson, K. M., Njoku, E. G., Small, E. E., and Zreda, M.: State of the Art in Large-Scale Soil Moisture Monitoring, *Soil Science Society of America Journal*, 77, 1888–1919, <https://doi.org/10.2136/sssaj2013.03.0093>, 2013.  
920 Parrish, D. D., Allen, D. T., Bates, T. S., Estes, M., Fehsenfeld, F. C., Feingold, G., Ferrare, R., Hardesty, R. M., Meagher, J. F., Nielsen-Gammon, J. W., Pierce, R. B., Ryerson, T. B., Seinfeld, J. H., and Williams, E. J.: Overview of the Second Texas Air Quality Study (TexAQS II) and the Gulf of Mexico Atmospheric Composition and Climate Study (GoMACCS), *J. Geophys. Res. Atmospheres*, 114, <https://doi.org/10.1029/2009JD011842>, 2009.
- 925 Parrish, D. D., Ryerson, T. B., Mellqvist, J., Johansson, J., Fried, A., Richter, D., Walega, J. G., Washenfelder, R. A., de Gouw, J. A., Peischl, J., Aikin, K. C., McKeen, S. A., Frost, G. J., Fehsenfeld, F. C., and Herndon, S. C.: Primary and secondary sources of formaldehyde in urban atmospheres: Houston Texas region, *Atmospheric Chem. Phys.*, 12, 3273–3288, <https://doi.org/10.5194/acp-12-3273-2012>, 2012.
- Perring, A. E., Pusede, S. E., and Cohen, R. C.: An Observational Perspective on the Atmospheric Impacts of Alkyl and  
930 Multifunctional Nitrates on Ozone and Secondary Organic Aerosol, *Chem. Rev.*, 113, 5848–5870, <https://doi.org/10.1021/cr300520x>, 2013.
- Pinto, J. O., Jensen, A. A., Jiménez, P. A., Hertneky, T., Muñoz-Esparza, D., Dumont, A., and Steiner, M.: Real-time WRF large-eddy simulations to support uncrewed aircraft system (UAS) flight planning and operations during 2018 LAPSE-RATE, *Earth Syst. Sci. Data*, 13, 697–711, <https://doi.org/10.5194/essd-13-697-2021>, 2021.
- 935 Platt, U. and Stutz, J.: Differential Absorption Spectroscopy, in: *Differential Optical Absorption Spectroscopy*, Springer Berlin Heidelberg, Berlin, Heidelberg, 135–174, [https://doi.org/10.1007/978-3-540-75776-4\\_6](https://doi.org/10.1007/978-3-540-75776-4_6), 2008.
- Rammah, A., Whitworth, K. W., and Symanski, E.: Particle air pollution and gestational diabetes mellitus in Houston, Texas, *Environ. Res.*, 190, <https://doi.org/10.1016/j.envres.2020.109988>, 2020.



- Ren, X., van Duin, D., Cazorla, M., Chen, S., Mao, J., Zhang, L., Brune, W. H., Flynn, J. H., Grossberg, N., Lefter, B. L.,  
940 Rappenglück, B., Wong, K. W., Tsai, C., Stutz, J., Dibb, J. E., Thomas Jobson, B., Luke, W. T., and Kelley, P.: Atmospheric  
oxidation chemistry and ozone production: Results from SHARP 2009 in Houston, Texas, *J. Geophys. Res. Atmospheres*, 118,  
5770–5780, <https://doi.org/10.1002/jgrd.50342>, 2013.
- Rinne, H. J. I., Guenther, A. B., Greenberg, J. P., and Harley, P. C.: Isoprene and monoterpene fluxes measured above  
Amazonian rainforest and their dependence on light and temperature, *Atmos. Environ.*, 36, 2421–2426,  
945 [https://doi.org/10.1016/S1352-2310\(01\)00523-4](https://doi.org/10.1016/S1352-2310(01)00523-4), 2002.
- Sadeghi, B., Pouyaei, A., Choi, Y., and Rappenglueck, B.: Influence of seasonal variability on source characteristics of VOCs  
at Houston industrial area, *Atmos. Environ.*, 277, <https://doi.org/10.1016/j.atmosenv.2022.119077>, 2022.
- Schade, G. W. and Roest, G.: Source apportionment of non-methane hydrocarbons, NO<sub>x</sub> and H<sub>2</sub>S data from a central  
monitoring station in the Eagle Ford shale, Texas, *Elem. Sci. Anthr.*, 6, 35, <https://doi.org/10.1525/elementa.289>, 2018.
- 950 Schroeder, J. R., Crawford, J. H., Fried, A., Walega, J., Weinheimer, A., Wisthaler, A., Müller, M., Mikoviny, T., Chen, G.,  
Shook, M., Blake, D. R., and Tonnesen, G. S.: New insights into the column CH<sub>2</sub>O/NO<sub>2</sub> ratio as an indicator of near-surface  
ozone sensitivity, *J. Geophys. Res. Atmospheres*, 122, 8885–8907, <https://doi.org/10.1002/2017JD026781>, 2017.
- Shahriar, Md. T., Kadiyala, A., Kommalapati, R., and Huque, Z.: A Review of Ozone Studies in the  
Houston–Galveston–Brazoria Nonattainment Area, in: *Trace Materials in Air, Soil, and Water*, vol. 1210, American Chemical  
955 Society, 37–50, <https://doi.org/10.1021/bk-2015-1210.ch002>, 2015.
- Shrestha, S., Yoon, S., Alvarez, S. L., Wang, Y., Flynn, J. H., Usenko, S., and Sheesley, R. J.: Emission Ratios and Diurnal  
Variability of Volatile Organic Compounds and Influence of Industrial Emissions in Two Texas Cities, *Atmosphere*, 14, 1006,  
<https://doi.org/10.3390/atmos14061006>, 2023.
- Sillman, S., Vautard, R., Menut, L., and Kley, D.: O<sub>3</sub>-NO<sub>x</sub>-VOC sensitivity and NO<sub>x</sub>-VOC indicators in Paris: Results from  
960 models and Atmospheric Pollution Over the Paris Area (ESQUIF) measurements, *J. Geophys. Res. Atmospheres*, 108,  
<https://doi.org/10.1029/2002JD001561>, 2003.
- Silvern, R. F., Jacob, D. J., Mickley, L. J., Sulprizio, M. P., Travis, K. R., Marais, E. A., Cohen, R. C., Laughner, J. L., Choi,  
S., Joiner, J., and Lamsal, L. N.: Using satellite observations of tropospheric NO<sub>2</sub> columns to infer long-term trends in US NO<sub>x</sub>  
emissions: the importance of accounting for the free tropospheric NO<sub>2</sub> background, *Atmospheric Chem. Phys.*, 19, 8863–8878,  
965 <https://doi.org/10.5194/acp-19-8863-2019>, 2019.
- Soleimanian, E., Wang, Y., Li, W., Liu, X., Griggs, T., Flynn, J., Walter, P. J., and Estes, M. J.: Understanding ozone episodes  
during the TRACER-AQ campaign in Houston, Texas: The role of transport and ozone production sensitivity to precursors,  
*Sci. Total Environ.*, 900, 165881, <https://doi.org/10.1016/j.scitotenv.2023.165881>, 2023.
- Song, J., Lei, W., Bei, N., Zavala, M., de Foy, B., Volkamer, R., Cardenas, B., Zheng, J., Zhang, R., and Molina, L. T.: Ozone  
970 response to emission changes: a modeling study during the MCMA-2006/MILAGRO Campaign, *Atmospheric Chem. Phys.*,  
10, 3827–3846, <https://doi.org/10.5194/acp-10-3827-2010>, 2010.



- Souri, A. H., Choi, Y., Li, X., Kotsakis, A., and Jiang, X.: A 15-year climatology of wind pattern impacts on surface ozone in Houston, Texas, *Atmospheric Res.*, 174–175, 124–134, <https://doi.org/10.1016/j.atmosres.2016.02.007>, 2016a.
- Souri, A. H., Choi, Y., Jeon, W., Li, X., Pan, S., Diao, L., and Westenbarger, D. A.: Constraining NO<sub>x</sub> emissions using satellite  
975 NO<sub>2</sub> measurements during 2013 DISCOVER-AQ Texas campaign, *Atmos. Environ.*, 131, 371–381, <https://doi.org/10.1016/j.atmosenv.2016.02.020>, 2016b.
- Souri, A. H., Choi, Y., Pan, S., Curci, G., Nowlan, C. R., Janz, S. J., Kowalewski, M. G., Liu, J., Herman, J. R., and Weinheimer, A. J.: First Top-Down Estimates of Anthropogenic NO<sub>x</sub> Emissions Using High-Resolution Airborne Remote Sensing Observations, *J. Geophys. Res. Atmospheres*, 123, 3269–3284, <https://doi.org/10.1002/2017JD028009>, 2018.
- 980 Souri, A. H., Nowlan, C. R., Wolfe, G. M., Lamsal, L. N., Chan Miller, C. E., Abad, G. G., Janz, S. J., Fried, A., Blake, D. R., Weinheimer, A. J., Diskin, G. S., Liu, X., and Chance, K.: Revisiting the effectiveness of HCHO/NO<sub>2</sub> ratios for inferring ozone sensitivity to its precursors using high resolution airborne remote sensing observations in a high ozone episode during the KORUS-AQ campaign, *Atmos. Environ.*, 224, 117341, <https://doi.org/10.1016/j.atmosenv.2020.117341>, 2020.
- Spinei, E., Whitehill, A., Fried, A., Tiefengraber, M., Knepp, T. N., Herndon, S., Herman, J. R., Müller, M., Abuhassan, N.,  
985 Cede, A., Richter, D., Walega, J., Crawford, J., Szykman, J., Valin, L., Williams, D. J., Long, R., Swap, R. J., Lee, Y., Nowak, N., and Poche, B.: The first evaluation of formaldehyde column observations by improved Pandora spectrometers during the KORUS-AQ field study, *Atmospheric Meas. Tech.*, 11, 4943–4961, <https://doi.org/10.5194/amt-11-4943-2018>, 2018.
- Spiridonov, V., Jakimovski, B., Spiridonova, I., and Pereira, G.: Development of air quality forecasting system in Macedonia, based on WRF-Chem model, *Air Qual. Atmosphere Health*, 12, 825–836, <https://doi.org/10.1007/s11869-019-00698-5>, 2019.
- 990 Sprengnether, M., Demerjian, K. L., Donahue, N. M., and Anderson, J. G.: Product analysis of the OH oxidation of isoprene and 1,3-butadiene in the presence of NO, *J. Geophys. Res. Atmospheres*, 107, ACH 8-1-ACH 8-13, <https://doi.org/10.1029/2001JD000716>, 2002.
- Stockwell, W. R.: Effects of turbulence on gas-phase atmospheric chemistry: Calculation of the relationship between time scales for diffusion and chemical reaction, *Meteorol. Atmospheric Phys.*, 57, 159–171, <https://doi.org/10.1007/BF01044159>,  
995 1995.
- Tan, Z., Lu, K., Jiang, M., Su, R., Wang, H., Lou, S., Fu, Q., Zhai, C., Tan, Q., Yue, D., Chen, D., Wang, Z., Xie, S., Zeng, L., and Zhang, Y.: Daytime atmospheric oxidation capacity in four Chinese megacities during the photochemically polluted season: a case study based on box model simulation, *Atmospheric Chem. Phys.*, 19, 3493–3513, <https://doi.org/10.5194/acp-19-3493-2019>, 2019.
- 1000 Tang, G., Wang, Y., Li, X., Ji, D., Hsu, S., and Gao, X.: Spatial-temporal variations in surface ozone in Northern China as observed during 2009–2010 and possible implications for future air quality control strategies, *Atmospheric Chem. Phys.*, 12, 2757–2776, <https://doi.org/10.5194/acp-12-2757-2012>, 2012.
- Tang, W., Pfister, G. G., Kumar, R., Barth, M., Edwards, D. P., Emmons, L. K., and Tilmes, S.: Capturing High-Resolution Air Pollution Features Using the Multi-Scale Infrastructure for Chemistry and Aerosols Version 0 (MUSICAv0) Global  
1005 Modeling System, *JGR Atmospheres*, 128, e2022JD038345, <https://doi.org/10.1029/2022JD038345>, 2023.



- Thompson, A. M., Stauffer, R. M., Boyle, T. P., Kollonige, D. E., Miyazaki, K., Tzortziou, M., Herman, J. R., Abuhassan, N., Jordan, C. E., and Lamb, B. T.: Comparison of Near-Surface NO<sub>2</sub> Pollution With Pandora Total Column NO<sub>2</sub> During the Korea-United States Ocean Color (KORUS OC) Campaign, *J. Geophys. Res. Atmospheres*, 124, 13560–13575, <https://doi.org/10.1029/2019JD030765>, 2019.
- 1010 Tie, X., Madronich, S., Walters, S., Zhang, R., Rasch, P., and Collins, W.: Effect of clouds on photolysis and oxidants in the troposphere, *J. Geophys. Res. Atmospheres*, 108, <https://doi.org/10.1029/2003JD003659>, 2003.
- Tonnesen, G. S. and Dennis, R. L.: Analysis of radical propagation efficiency to assess ozone sensitivity to hydrocarbons and NO<sub>x</sub>: 2. Long-lived species as indicators of ozone concentration sensitivity, *J. Geophys. Res. Atmospheres*, 105, 9227–9241, <https://doi.org/10.1029/1999JD900372>, 2000.
- 1015 Uebel, M. and Bott, A.: Influence of complex terrain and anthropogenic emissions on atmospheric CO<sub>2</sub> patterns—a high-resolution numerical analysis, *Q. J. R. Meteorol. Soc.*, 144, 34–47, <https://doi.org/10.1002/qj.3182>, 2018.
- Vizuite, W., Nielsen-Gammon, J., Dickey, J., Couzo, E., Blanchard, C., Breitenbach, P., Rasool, Q. Z., and Byun, D.: Meteorological based parameters and ozone exceedances in Houston and other cities in Texas, *J. Air Waste Manag. Assoc.*, 72, 969–984, <https://doi.org/10.1080/10962247.2022.2064004>, 2022.
- 1020 Wang, S., Coggon, M. M., Gkatzelis, G. I., Warneke, C., Bourgeois, I., Ryerson, T., Peischl, J., Veres, P. R., Neuman, J. A., Hair, J., Shingler, T., Fenn, M., Diskin, G., Huey, L. G., Lee, Y. R., Apel, E. C., Hornbrook, R. S., Hills, A. J., Hall, S. R., Ullmann, K., Bela, M. M., Trainer, M. K., Kumar, R., Orlando, J. J., Flocke, F. M., and Emmons, L. K.: Chemical Tomography in a Fresh Wildland Fire Plume: A Large Eddy Simulation (LES) Study, *J. Geophys. Res. Atmospheres*, 126, e2021JD035203, <https://doi.org/10.1029/2021JD035203>, 2021.
- 1025 Ward, N. D., Megonigal, J. P., Bond-Lamberty, B., Bailey, V. L., Butman, D., Canuel, E. A., Diefenderfer, H., Ganju, N. K., Goñi, M. A., Graham, E. B., Hopkinson, C. S., Khangaonkar, T., Langley, J. A., McDowell, N. G., Myers-Pigg, A. N., Neumann, R. B., Osburn, C. L., Price, R. M., Rowland, J., Sengupta, A., Simard, M., Thornton, P. E., Tzortziou, M., Vargas, R., Weisenhorn, P. B., and Windham-Myers, L.: Representing the function and sensitivity of coastal interfaces in Earth system models, *Nat Commun*, 11, 2458, <https://doi.org/10.1038/s41467-020-16236-2>, 2020.
- 1030 Wang, Y., Ma, Y.-F., Muñoz-Esparza, D., Dai, J., Li, C. W. Y., Lichtig, P., Tsang, R. C. W., Liu, C.-H., Wang, T., and Brasseur, G. P.: Coupled mesoscale-LES modeling of air quality in a polluted city using WRF-LES-Chem, *Atmospheric Chem. Phys.*, 23, 5905–5927, <https://doi.org/10.5194/acp-23-5905-2023>, 2023.
- Whalley, L. K., Stone, D., Bandy, B., Dunmore, R., Hamilton, J. F., Hopkins, J., Lee, J. D., Lewis, A. C., and Heard, D. E.: Atmospheric OH reactivity in central London: observations, model predictions and estimates of in situ ozone production, *Atmospheric Chem. Phys.*, 16, 2109–2122, <https://doi.org/10.5194/acp-16-2109-2016>, 2016.
- 1035 Wiedinmyer, C., Kimura, Y., McDonald-Buller, E. C., Emmons, L. K., Buchholz, R. R., Tang, W., Seto, K., Joseph, M. B., Barsanti, K. C., Carlton, A. G., and Yokelson, R.: The Fire Inventory from NCAR version 2.5: an updated global fire emissions model for climate and chemistry applications, *Atmospheric sciences*, <https://doi.org/10.5194/egusphere-2023-124>, 2023.
- Wong, K. W., Tsai, C., Lefer, B., Grossberg, N., and Stutz, J.: Modeling of daytime HONO vertical gradients during SHARP
- 1040 2009, *Atmospheric Chem. Phys.*, 13, 3587–3601, <https://doi.org/10.5194/acp-13-3587-2013>, 2013.



- Xiang, Y., Zhang, T., Liu, J., Lv, L., Dong, Y., and Chen, Z.: Atmosphere boundary layer height and its effect on air pollutants in Beijing during winter heavy pollution, *Atmospheric Res.*, 215, 305–316, <https://doi.org/10.1016/j.atmosres.2018.09.014>, 2019.
- Xue, L., Gu, R., Wang, T., Wang, X., Saunders, S., Blake, D., Louie, P. K. K., Luk, C. W. Y., Simpson, I., Xu, Z., Wang, Z.,  
1045 Gao, Y., Lee, S., Mellouki, A., and Wang, W.: Oxidative capacity and radical chemistry in the polluted atmosphere of Hong Kong and Pearl River Delta region: analysis of a severe photochemical smog episode, *Atmospheric Chem. Phys.*, 16, 9891–9903, <https://doi.org/10.5194/acp-16-9891-2016>, 2016.
- Yang, Y., Shao, M., Wang, X., Nölscher, A. C., Kessel, S., Guenther, A., and Williams, J.: Towards a quantitative understanding of total OH reactivity: A review, *Atmos. Environ.*, 134, 147–161,  
1050 <https://doi.org/10.1016/j.atmosenv.2016.03.010>, 2016.
- Ye, L., Wang, X., Fan, S., Chen, W., Chang, M., Zhou, S., Wu, Z., and Fan, Q.: Photochemical indicators of ozone sensitivity: application in the Pearl River Delta, China, *Front. Environ. Sci. Eng.*, 10, 15, <https://doi.org/10.1007/s11783-016-0887-1>, 2016.
- Yu, D., Tan, Z., Lu, K., Ma, X., Li, X., Chen, S., Zhu, B., Lin, L., Li, Y., Qiu, P., Yang, X., Liu, Y., Wang, H., He, L., Huang,  
1055 X., and Zhang, Y.: An explicit study of local ozone budget and NO<sub>x</sub>-VOCs sensitivity in Shenzhen China, *Atmos. Environ.*, 224, 117304, <https://doi.org/10.1016/j.atmosenv.2020.117304>, 2020.
- Zeng, J., Zhang, Y., Mu, Z., Pang, W., Zhang, H., Wu, Z., Song, W., and Wang, X.: Temperature and light dependency of isoprene and monoterpene emissions from tropical and subtropical trees: Field observations in south China, *Appl. Geochem.*, 155, 105727, <https://doi.org/10.1016/j.apgeochem.2023.105727>, 2023.
- 1060 Zhang, G., Sun, Y., Xu, W., Wu, L., Duan, Y., Liang, L., and Li, Y.: Identifying the O<sub>3</sub> chemical regime inferred from the weekly pattern of atmospheric O<sub>3</sub>, CO, NO<sub>x</sub>, and PM<sub>10</sub>: Five-year observations at a center urban site in Shanghai, China, *Sci. Total Environ.*, 888, 164079, <https://doi.org/10.1016/j.scitotenv.2023.164079>, 2023.
- Zhang, H., Zheng, Z., Yu, T., Liu, C., Qian, H., and Li, J.: Seasonal and diurnal patterns of outdoor formaldehyde and impacts on indoor environments and health, *Environ. Res.*, 205, 112550, <https://doi.org/10.1016/j.envres.2021.112550>, 2022.
- 1065 Zhou, W., Cohan, D. S., and Henderson, B. H.: Slower ozone production in Houston, Texas following emission reductions: Evidence from Texas Air Quality Studies in 2000 and 2006, *Atmospheric Chem. Phys.*, 14, 2777–2788, <https://doi.org/10.5194/acp-14-2777-2014>, 2014.
- Zhu, J., Wang, S., Wang, H., Jing, S., Lou, S., Saiz-Lopez, A., and Zhou, B.: Observationally constrained modeling of atmospheric oxidation capacity and photochemical reactivity in Shanghai, China, *Atmospheric Chem. Phys.*, 20, 1217–1232,  
1070 <https://doi.org/10.5194/acp-20-1217-2020>, 2020.
